# Supplementary material for: Identification of Group A Streptococcus Genes Directly Regulated by CsrRS and Novel Intermediate Regulators
Source: PubMed Central journal article supplement (PMC8406183; doi:10.1128/mbio.01642-21), 2021-07-13
Supplement: mbio.01642-21-sf001.pdf [file mbio.01642-21-sf001.pdf]

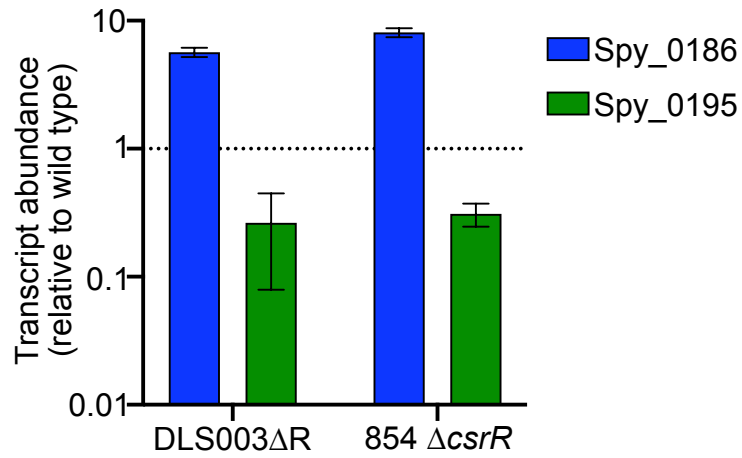

**Figure S1. Regulation of *Spy\_0186* and *Spy\_0195* by CsrR in GAS strains 854 and DLS003.** Data represent fold-change in transcript abundance of *Spy\_0186* and *Spy\_0195* as assessed by qRT-PCR in strain DLS003ΔR relative to that in DLS003 (left) or in strain 854Δ*csrR* relative to that in 854 (right). Values are mean±SEM of duplicate samples of three biological replicates.
