# Supplementary material for: Identification of Group A Streptococcus Genes Directly Regulated by CsrRS and Novel Intermediate Regulators
Source: PubMed Central journal article supplement (PMC8406183; doi:10.1128/mbio.01642-21), 2021-07-13
Supplement: mbio.01642-21-st001.pdf [file mbio.01642-21-st001.pdf]

**Table S1. CsrR regulon of GAS strain 854 as determined by RNAseq**

| Gene Locus* | Gene name        | Gene product                                                         | Log2-fold change $\Delta csrR$ vs. WT | Adjusted $p$ -value |
|-------------|------------------|----------------------------------------------------------------------|---------------------------------------|---------------------|
| Spy_0017    | <i>sibA</i>      | secreted protein                                                     | -1.04                                 | 2.57E-04            |
| Spy_0029    | <i>purD</i>      | phosphoribosylamine-glycine ligase                                   | -1.25                                 | 3.05E-02            |
| Spy_0034    | -                | transcription regulator                                              | 1.37                                  | 2.75E-04            |
| Spy_0113    | -                | transposase                                                          | 7.17                                  | 1.30E-14            |
| Spy_0115    | -                | hypothetical protein                                                 | 9.45                                  | 1.94E-121           |
| Spy_0117    | -                | LysR family transcription regulator                                  | 1.22                                  | 8.25E-03            |
| Spy_0118    | -                | LysR family transcription regulator                                  | 1.00                                  | 3.56E-02            |
| Spy_0129    | <i>ntpC</i>      | V-type ATP synthase subunit C                                        | 1.08                                  | 7.00E-02            |
| Spy_0139    | <i>nga</i>       | NAD glycohydrolase                                                   | 3.12                                  | 3.90E-12            |
| Spy_0140    | <i>ifs</i>       | NADase inhibitor                                                     | 3.00                                  | 2.42E-10            |
| Spy_0141    | <i>slo</i>       | streptolysin O                                                       | 2.55                                  | 2.10E-10            |
| Spy_0143    | -                | hypothetical protein                                                 | 11.99                                 | 7.94E-21            |
| Spy_0144    | -                | hypothetical protein                                                 | 9.87                                  | 8.19E-15            |
| Spy_0155    | -                | BglG family transcription antiterminator                             | -1.03                                 | 6.73E-03            |
| Spy_0157    | <i>opuAA</i>     | glycine betaine transport ATP-binding protein                        | -1.89                                 | 3.36E-06            |
| Spy_0158    | <i>opuABC</i>    | glycine betaine-binding protein/glycine betaine transporter permease | -1.53                                 | 2.77E-05            |
| Spy_0186    | -                | transcription regulator                                              | 1.67                                  | 3.07E-06            |
| Spy_0195    | -                | MarR family transcription regulator                                  | -1.69                                 | 5.54E-04            |
| Spy_0196    | -                | multidrug resistance ABC transporter ATP-binding protein/permease    | -1.37                                 | 2.41E-04            |
| Spy_0197    | -                | multidrug resistance ABC transporter ATP-binding protein/permease    | -1.09                                 | 1.45E-03            |
| Spy_0275    | -                | serine/threonine transporter SstT                                    | -2.05                                 | 1.70E-09            |
| Spy_0282    | <i>csrR</i>      | response regulator                                                   | -12.95                                | 1.78E-20            |
| Spy_0341    | <i>scpC/prtS</i> | IL-8 protease                                                        | 2.68                                  | 2.08E-15            |
| Spy_0351    | <i>spyA</i>      | C3 family ADP-ribosyltransferase                                     | 3.02                                  | 9.61E-32            |
| Spy_0352    | -                | hypothetical protein                                                 | 6.33                                  | 1.31E-37            |
| Spy_0354    | -                | hypothetical protein                                                 | 3.14                                  | 2.49E-22            |
| Spy_0355    | -                | hypothetical protein                                                 | 4.18                                  | 2.20E-02            |
| Spy_0356    | <i>speJ</i>      | pyrogenic exotoxin type J                                            | 1.84                                  | 9.15E-04            |
| Spy_0357    | -                | hypothetical protein                                                 | 2.42                                  | 3.59E-12            |
| Spy_0374    | <i>rplK</i>      | 50S ribosomal protein L11                                            | -1.04                                 | 3.98E-03            |
| Spy_0375    | <i>rplA</i>      | 50S ribosomal protein L1                                             | -1.04                                 | 2.10E-04            |
| Spy_0551    | <i>rplS</i>      | 50S ribosomal protein L19                                            | -1.77                                 | 4.57E-13            |
| Spy_0557    | -                | transposase                                                          | 1.89                                  | 4.62E-07            |
| Spy_0558    | -                | transposase                                                          | 1.53                                  | 1.35E-02            |

|          |              |                                                             |       |          |
|----------|--------------|-------------------------------------------------------------|-------|----------|
| Spy_0559 | -            | transcription regulator                                     | 1.92  | 1.78E-05 |
| Spy_0560 |              | transcription regulator                                     | 1.60  | 1.07E-05 |
| Spy_0561 | <i>epf</i>   | extracellular matrix binding protein                        | 4.30  | 4.57E-45 |
| Spy_0562 | <i>sagA</i>  | streptolysin S                                              | 1.82  | 1.59E-09 |
| Spy_0563 | <i>sagB</i>  | streptolysin S biosynthesis protein                         | 1.83  | 7.15E-05 |
| Spy_0564 | <i>sagC</i>  | streptolysin S biosynthesis protein                         | 2.17  | 6.04E-07 |
| Spy_0565 | <i>sagD</i>  | streptolysin S biosynthesis protein                         | 2.05  | 4.28E-07 |
| Spy_0566 | <i>sagE</i>  | streptolysin S self-immunity protein                        | 1.95  | 3.81E-07 |
| Spy_0567 | <i>sagF</i>  | streptolysin S biosynthesis protein                         | 2.11  | 3.82E-08 |
| Spy_0568 | <i>sagG</i>  | streptolysin S export ATP-binding protein                   | 1.84  | 2.00E-05 |
| Spy_0569 | <i>sagH</i>  | streptolysin S export transmembrane protein                 | 2.02  | 2.57E-07 |
| Spy_0570 | <i>sagl</i>  | streptolysin S export transmembrane protein                 | 1.83  | 3.61E-05 |
| Spy_0648 | <i>rpsP</i>  | 30S ribosomal protein S16                                   | -1.14 | 1.34E-05 |
| Spy_0651 | -            | cell surface protein                                        | -1.81 | 8.35E-07 |
| Spy_0652 | -            | hypothetical protein                                        | -1.53 | 8.76E-02 |
| Spy_0665 | -            | transposase                                                 | 3.33  | 1.60E-02 |
| Spy_0666 | -            | hypothetical protein                                        | 5.21  | 4.24E-03 |
| Spy_0667 | <i>speC</i>  | pyrogenic exotoxin type C                                   | 9.06  | 1.72E-09 |
| Spy_0668 | <i>mac</i>   | IgG-degrading protease                                      | 10.01 | 1.45E-15 |
| Spy_0707 | -            | cystine transporter permease                                | 1.08  | 5.39E-04 |
| Spy_0777 | -            | hypothetical protein                                        | 2.93  | 3.22E-36 |
| Spy_0858 | <i>xpt</i>   | xanthine phosphoribosyltransferase                          | -1.59 | 4.41E-02 |
| Spy_0859 | -            | xanthine permease                                           | -1.00 | 3.12E-02 |
| Spy_0978 | -            | Na(+)-linked D-alanine glycine permease                     | -1.06 | 4.29E-02 |
| Spy_0996 | <i>speA2</i> | enterotoxin                                                 | 2.54  | 9.97E-08 |
| Spy_1066 | <i>amyB</i>  | neopullulanase/cyclomaltoextrinase/maltogenic alpha-amylase | 1.01  | 2.06E-03 |
| Spy_1079 | -            | PTS system cellobiose-specific transporter subunit IIC      | 1.47  | 7.37E-02 |
| Spy_1114 | -            | hypothetical protein                                        | 1.53  | 1.27E-08 |
| Spy_1139 | <i>nagB</i>  | glucosamine-6-phosphate isomerase                           | -2.37 | 1.15E-02 |
| Spy_1142 | -            | hypothetical protein                                        | 1.37  | 8.45E-05 |
| Spy_1144 | -            | hypothetical protein                                        | 1.95  | 5.28E-05 |
| Spy_1169 | <i>spd3</i>  | DNase                                                       | 1.23  | 4.58E-03 |
| Spy_1170 | -            | hypothetical protein                                        | 1.15  | 5.78E-03 |
| Spy_1237 | <i>artP</i>  | arginine transport ATP-binding protein                      | -1.58 | 1.60E-03 |
| Spy_1238 | <i>artQ</i>  | arginine transporter permease                               | -1.16 | 7.37E-02 |
| Spy_1270 | <i>arcC</i>  | carbamate kinase                                            | 1.06  | 4.33E-02 |
| Spy_1273 | <i>arcB</i>  | ornithine carbamoyltransferase                              | 1.12  | 3.66E-03 |
| Spy_1274 | -            | acetyltransferase                                           | 1.28  | 8.20E-04 |
| Spy_1275 | <i>arcA</i>  | arginine deiminase                                          | 1.12  | 2.42E-03 |
| Spy_1286 | -            | DNA polymerase                                              | 2.00  | 2.55E-06 |

|          |                |                                                       |       |          |
|----------|----------------|-------------------------------------------------------|-------|----------|
| Spy_1287 | -              | hypothetical protein                                  | 1.13  | 9.47E-02 |
| Spy_1288 | -              | hypothetical protein                                  | 1.52  | 4.94E-03 |
| Spy_1289 | -              | hypothetical protein                                  | 2.39  | 2.90E-08 |
| Spy_1290 | -              | hypothetical protein                                  | 2.23  | 6.65E-04 |
| Spy_1291 | -              | ATP-dependent RNA helicase                            | 3.50  | 8.47E-12 |
| Spy_1401 | -              | PTS system galactose-specific transporter subunit IIA | 1.11  | 2.20E-05 |
| Spy_1407 | -              | esterase                                              | 1.43  | 7.08E-02 |
| Spy_1415 | <i>sdaD2</i>   | phage-encoded DNase                                   | 3.28  | 4.44E-15 |
| Spy_1472 | <i>hit</i>     | bis(5'-nucleosyl)-tetraphosphatase (asymmetrical)     | 1.52  | 1.69E-09 |
| Spy_1473 | -              | hypothetical protein                                  | 1.34  | 3.61E-05 |
| Spy_1477 | -              | guanine-hypoxanthine permease                         | -1.87 | 3.09E-07 |
| Spy_1492 | <i>fabK</i>    | enoyl-ACP reductase                                   | -1.01 | 2.80E-03 |
| Spy_1493 | <i>acpP</i>    | acyl carrier protein                                  | -1.03 | 8.05E-05 |
| Spy_1517 | -              | lantibiotic transport permease                        | 1.48  | 6.82E-03 |
| Spy_1528 | -              | ferrichrome-binding protein                           | -1.83 | 5.35E-02 |
| Spy_1531 | <i>isp2</i>    | hypothetical protein                                  | 1.99  | 4.27E-29 |
| Spy_1540 | <i>endoS</i>   | endo-beta-N-acetylglucosaminidase F2                  | -1.29 | 9.05E-03 |
| Spy_1542 | <i>scrA</i>    | PTS system sucrose-specific transporter subunit IIABC | -1.04 | 4.33E-02 |
| Spy_1556 | -              | hypothetical protein                                  | 3.89  | 3.94E-14 |
| Spy_1557 | <i>mutY</i>    | A/G-specific adenine glycosylase                      | 2.05  | 1.59E-16 |
| Spy_1573 | <i>glpF.2</i>  | glycerol uptake facilitator protein                   | -1.06 | 1.21E-04 |
| Spy_1646 | <i>prsl</i>    | 30S ribosomal protein S9                              | -1.13 | 8.34E-07 |
| Spy_1647 | <i>rplM</i>    | 50S ribosomal protein L13                             | -1.08 | 1.16E-04 |
| Spy_1684 | <i>ska</i>     | streptokinase                                         | 4.32  | 7.70E-65 |
| Spy_1687 | <i>sclA</i>    | collagen-like surface protein                         | 7.75  | 9.53E-07 |
| Spy_1689 | -              | hypothetical protein                                  | 10.35 | 2.00E-12 |
| Spy_1704 | <i>dppA</i>    | dipeptide-binding protein                             | -1.93 | 5.39E-18 |
| Spy_1705 | <i>dppB</i>    | dipeptide transporter permease                        | -1.39 | 2.42E-03 |
| Spy_1706 | <i>dppC</i>    | dipeptide transporter permease                        | -1.77 | 1.21E-04 |
| Spy_1707 | <i>dppD</i>    | dipeptide transport ATP-binding protein               | -1.84 | 1.23E-04 |
| Spy_1708 | <i>dppE</i>    | dipeptide transport ATP-binding protein               | -1.80 | 4.35E-04 |
| Spy_1709 | -              | hypothetical protein                                  | 1.13  | 8.35E-07 |
| Spy_1714 | -              | cell surface protein                                  | 1.53  | 4.08E-15 |
| Spy_1715 | <i>scpA</i>    | C5A peptidase                                         | 1.76  | 6.10E-12 |
| Spy_1718 | <i>sic1.01</i> | inhibitor of complement protein                       | 2.99  | 1.13E-56 |
| Spy_1731 | -              | hypothetical protein                                  | 2.29  | 3.88E-03 |
| Spy_1732 | <i>prsA</i>    | foldase PrsA                                          | -1.08 | 2.10E-04 |
| Spy_1733 | -              | hypothetical protein                                  | 3.69  | 2.10E-04 |
| Spy_1738 | <i>spd</i>     | phage-associated deoxyribonuclease                    | 2.00  | 8.21E-13 |
| Spy_1782 | <i>pepO</i>    | neutral endopeptidase                                 | 1.56  | 1.00E-15 |

|                                                      |             |                                             |       |           |
|------------------------------------------------------|-------------|---------------------------------------------|-------|-----------|
| Spy_1839                                             | -           | MutT/nudix family protein                   | -1.15 | 6.48E-02  |
| Spy_1851                                             | <i>hasA</i> | hyaluronan synthase                         | 6.41  | 3.57E-89  |
| Spy_1852                                             | <i>hasB</i> | UDP-glucose 6-dehydrogenase                 | 6.16  | 4.86E-110 |
| Spy_1853                                             | <i>hasC</i> | UTP-glucose-1-phosphate uridylyltransferase | 6.10  | 7.34E-96  |
| Shaded genes indicate a member of a putative operon. |             |                                             |       |           |
| *Gene locus numbers refer to MGAS5005 genome.        |             |                                             |       |           |
