# Supplementary material for: Identification of Group A Streptococcus Genes Directly Regulated by CsrRS and Novel Intermediate Regulators
Source: PubMed Central journal article supplement (PMC8406183; doi:10.1128/mbio.01642-21), 2021-07-13
Supplement: mbio.01642-21-st002.pdf [file mbio.01642-21-st002.pdf]

**Table S2. List of genes included in NanoString studies.**

| Gene Locus* | Gene name     | Gene product                                                         | Log2-fold change $\Delta$ csrR vs. WT |            | Reason included in NanoString library |              |                |            |
|-------------|---------------|----------------------------------------------------------------------|---------------------------------------|------------|---------------------------------------|--------------|----------------|------------|
|             |               |                                                                      | RNAseq                                | NanoString | Additional assay (this study)         |              | Previous study |            |
| Spy_0017    | <i>sibA</i>   | secreted protein                                                     | -1.04                                 |            |                                       |              |                | (2, 3)     |
| Spy_0029    | <i>purD</i>   | phosphoribosylamine-glycine ligase                                   | -1.25                                 |            | RNAseq                                |              |                | (2)        |
| Spy_0034    | -             | transcription regulator                                              | 1.37                                  | 1.11       | RNAseq                                | LL37<br>ChIP | Mg<br>ChIP     |            |
| Spy_0083    | <i>rpoB</i>   | DNA-directed RNA polymerase subunit beta                             |                                       |            |                                       | LL37<br>ChIP | Mg<br>ChIP     |            |
| Spy_0095    | -             | hypothetical protein                                                 |                                       |            |                                       |              |                | (3)        |
| Spy_0106    | <i>rofA</i>   | transcriptional regulator                                            |                                       |            |                                       | LL37<br>ChIP |                | (2, 14)    |
| Spy_0113    | -             | transposase                                                          | 7.17                                  | 7.63       | RNAseq                                |              |                |            |
| Spy_0115    | -             | hypothetical protein                                                 | 9.45                                  | 10.21      | RNAseq                                | LL37<br>ChIP | Mg<br>ChIP     | (2, 3, 14) |
| Spy_0124    | -             | Putative regulatory protein                                          |                                       |            |                                       |              |                | (3)        |
| Spy_0131    | <i>ntpA</i>   | putative V-type Na ATPase alpha subunit                              | 1.08                                  |            | RNAseq                                |              |                | (3)        |
| Spy_0139    | <i>nga</i>    | NAD glycohydrolase                                                   | 3.12                                  | 3.06       | RNAseq                                |              | Mg<br>ChIP     | (2, 14)    |
| Spy_0140    | <i>ifs</i>    | hypothetical protein                                                 |                                       |            | RNAseq                                |              |                | (14)       |
| Spy_0141    | <i>slo</i>    | streptolysin O                                                       | 2.55                                  | 2.87       | RNAseq                                | LL37<br>ChIP |                | (2, 14)    |
| Spy_0142    | -             | hypothetical protein                                                 |                                       | 2.22       |                                       |              | Mg<br>ChIP     | (14)       |
| Spy_0143    | -             | hypothetical protein                                                 | 11.99                                 | 11.49      | RNAseq                                | LL37<br>ChIP | Mg<br>ChIP     | (3)        |
| Spy_0144    | -             | hypothetical protein                                                 | 9.87                                  | 10.52      | RNAseq                                | LL37<br>ChIP | Mg<br>ChIP     | (3, 14)    |
| Spy_0145    | -             | hypothetical protein                                                 |                                       |            |                                       | LL37<br>ChIP | Mg<br>ChIP     |            |
| Spy_0146    | <i>metB</i>   | cystathionine beta-lyase                                             |                                       |            |                                       | LL37<br>ChIP | Mg<br>ChIP     |            |
| Spy_0157    | <i>opuAA</i>  | glycine betaine transport ATP-binding protein                        | -1.89                                 | -2.74      | RNAseq                                |              |                | (2)        |
| Spy_0158    | <i>opuABC</i> | glycine betaine-binding protein/glycine betaine transporter permease |                                       |            |                                       | RNAseq       |                | (2, 3)     |

|          |                  |                                       |        |       |        |              |            |  |            |
|----------|------------------|---------------------------------------|--------|-------|--------|--------------|------------|--|------------|
| Spy_0161 | <i>perR</i>      | ferric transport regulator protein    |        |       |        |              |            |  | (2)        |
| Spy_0180 | -                | murein endopeptidase                  |        | 1.56  | RNAseq |              |            |  | (2)        |
| Spy_0182 | <i>speG</i>      | exotoxin type G                       |        |       |        | LL37<br>ChIP |            |  |            |
| Spy_0186 | -                | transcription regulator               | 1.67   | 2.66  | RNAseq | LL37<br>ChIP | Mg<br>ChIP |  | (2)        |
| Spy_0195 | -                | MarR family transcription regulator   | -1.69  | -1.71 | RNAseq | LL37<br>ChIP |            |  |            |
| Spy_0205 | <i>fasC</i>      | putative histidine kinase             |        |       |        |              |            |  | (2)        |
| Spy_0275 | -                | serine/threonine transporter SstT     | -2.05  | -1.67 | RNAseq | LL37<br>ChIP | Mg<br>ChIP |  |            |
| Spy_0281 | -                | hypothetical protein                  |        | 1.02  |        |              | Mg<br>ChIP |  |            |
| Spy_0282 | <i>csrR</i>      | response regulator                    | -12.95 | -8.69 | RNAseq | LL37<br>ChIP | Mg<br>ChIP |  | (2)        |
| Spy_0341 | <i>scpC/prtS</i> | IL-8 protease                         | 2.68   | 4.58  | RNAseq | LL37<br>ChIP | Mg<br>ChIP |  | (2, 3, 14) |
| Spy_0351 | <i>spyA</i>      | C3 family ADP-ribosyltransferase      | 3.02   | 3.27  | RNAseq |              | Mg<br>ChIP |  | (2, 14)    |
| Spy_0352 | -                | hypothetical protein                  | 6.33   | 7.29  | RNAseq |              | Mg<br>ChIP |  |            |
| Spy_0354 | -                | hypothetical protein                  | 3.14   | 3.51  | RNAseq |              | Mg<br>ChIP |  |            |
| Spy_0355 | -                | hypothetical protein                  | 4.18   | 6.6   | RNAseq | LL37<br>ChIP | Mg<br>ChIP |  |            |
| Spy_0356 | <i>speJ</i>      | pyrogenic exotoxin type J             | 1.84   | 2.16  | RNAseq |              | Mg<br>ChIP |  |            |
| Spy_0357 | -                | hypothetical protein                  | 2.42   | 2.35  | RNAseq |              | Mg<br>ChIP |  |            |
| Spy_0402 | -                | hypothetical protein                  |        |       |        |              | Mg<br>ChIP |  |            |
| Spy_0419 | -                | permease                              |        |       |        | LL37<br>ChIP |            |  | (2)        |
| Spy_0425 | -                | putative sugar transferase            |        |       |        |              |            |  | (3)        |
| Spy_0436 | <i>vick</i>      | two-component sensor histidine kinase |        |       |        |              |            |  | (2)        |
| Spy_0440 | -                | transcriptional regulator             |        |       |        | LL37<br>ChIP |            |  | (2)        |
| Spy_0444 | -                | hypothetical protein                  |        |       |        | LL37<br>ChIP | Mg<br>ChIP |  |            |

|          |             |                                                       |       |       |        |              |            |         |
|----------|-------------|-------------------------------------------------------|-------|-------|--------|--------------|------------|---------|
| Spy_0473 | -           | multidrug resistance protein B                        |       |       |        | LL37<br>ChIP |            |         |
| Spy_0474 | <i>licT</i> | BglG family transcription antiterminator              |       |       |        | LL37<br>ChIP |            |         |
| Spy_0475 | -           | beta-glucoside permease IIABC component               |       |       |        |              |            | (3)     |
| Spy_0476 | <i>bglA</i> | beta-glucosidase                                      |       |       |        |              |            |         |
| Spy_0500 | -           | N-acetylmuramoyl-L-alanine amidase                    |       | 1.07  |        | LL37<br>ChIP | Mg<br>ChIP |         |
| Spy_0501 | -           | hypothetical protein                                  |       |       |        | LL37<br>ChIP | Mg<br>ChIP |         |
| Spy_0529 | -           | (Fe-S)-binding protein                                |       |       |        | LL37<br>ChIP | Mg<br>ChIP |         |
| Spy_0545 | <i>agaS</i> | putative tagatose-6-phosphate aldose/ketose isomerase |       |       |        |              |            | (2, 3)  |
| Spy_0551 | <i>rplS</i> | 50S ribosomal protein L19                             | -1.77 | -1.38 | RNAseq |              |            | (2)     |
| Spy_0561 | <i>epf</i>  | extracellular matrix binding protein                  | 4.30  | 3.38  | RNAseq | LL37<br>ChIP | Mg<br>ChIP |         |
| Spy_0562 | <i>sagA</i> | streptolysin S                                        |       |       | RNAseq | LL37<br>ChIP | Mg<br>ChIP | (2, 3)  |
| Spy_0563 | <i>sagB</i> | streptolysin S biosynthesis protein                   | 1.83  | 0.99  | RNAseq |              |            | (2, 14) |
| Spy_0571 | -           | hypothetical protein                                  |       |       |        |              | Mg<br>ChIP |         |
| Spy_0598 | <i>mscL</i> | large-conductance mechanosensitive channel            |       |       |        | LL37<br>ChIP |            | (2)     |
| Spy_0622 | -           | methyltransferase                                     |       |       |        | LL37<br>ChIP |            | (2)     |
| Spy_0635 | <i>rpmA</i> | 50S ribosomal protein L27                             |       | -1.19 |        |              |            |         |
| Spy_0639 | <i>pyrR</i> | putative pyrimidine regulatory protein                |       | -1.79 |        |              |            | (3)     |
| Spy_0640 | <i>pyrP</i> | putative uricil permease                              |       | -1.56 |        |              |            |         |
| Spy_0641 | <i>pyrB</i> | putative aspartate transcarbamoylase                  |       |       |        | LL37<br>ChIP |            | (3)     |
| Spy_0642 | <i>carA</i> | putative carbamoylphosphate synthetase small subunit  |       |       |        |              |            | (3)     |
| Spy_0643 | <i>carB</i> | putative carbamoylphosphate synthetase                |       |       |        |              |            | (2, 3)  |

|          |              |                                                                                |       |       |        |              |            |            |
|----------|--------------|--------------------------------------------------------------------------------|-------|-------|--------|--------------|------------|------------|
| Spy_0648 | <i>rpsP</i>  | 30S ribosomal protein S16                                                      | -1.14 |       | RNAseq | LL37<br>ChIP |            |            |
| Spy_0651 | -            | cell surface protein                                                           | -1.81 | -1.01 | RNAseq | LL37<br>ChIP | Mg<br>ChIP | (2, 14)    |
| Spy_0652 | -            | hypothetical protein                                                           | -1.53 | -1.19 | RNAseq |              |            | (3)        |
| Spy_0668 | <i>mac</i>   | IgG-degrading protease                                                         | 10.01 | 7.42  | RNAseq | LL37<br>ChIP | Mg<br>ChIP | (2, 3, 14) |
| Spy_0673 | <i>papS</i>  | tRNA CCA-<br>pyrophosphorylase                                                 |       |       |        | LL37<br>ChIP |            | (2)        |
| Spy_0701 | <i>cpsY</i>  | transcriptional regulator                                                      |       |       |        |              |            | (2)        |
| Spy_0713 | <i>bcaT</i>  | branched-chain amino acid<br>aminotransferase                                  |       |       |        | LL37<br>ChIP | Mg<br>ChIP |            |
| Spy_0760 | -            | UDP-N-<br>acetylmuramoylalanyl-D-<br>glutamate--2,6-<br>diaminopimelate ligase |       |       |        | LL37<br>ChIP |            |            |
| Spy_0761 | -            | hypothetical protein                                                           |       |       |        | LL37<br>ChIP |            |            |
| Spy_0777 | -            | hypothetical protein                                                           | 2.93  | 3.34  | RNAseq |              | Mg<br>ChIP | (2)        |
| Spy_0784 | <i>yesN</i>  | putative two-component<br>sensor histidine kinase                              |       |       |        | LL37<br>ChIP |            | (2, 3)     |
| Spy_0790 | <i>gabD</i>  | putative succinic<br>semialdehyde<br>dehydrogenase                             |       |       |        |              |            | (3)        |
| Spy_0804 | <i>srtK</i>  | putative histidine kinase                                                      |       |       |        |              |            | (2)        |
| Spy_0809 | <i>srtE</i>  | conserved hypothetical<br>protein - lantibiotic                                |       |       |        |              |            | (3)        |
| Spy_0817 | <i>dacA1</i> | D-alanyl-D-alanine<br>carboxypeptidase                                         |       |       |        | LL37<br>ChIP |            |            |
| Spy_0831 | <i>dpiB</i>  | sensor kinase                                                                  |       |       |        | LL37<br>ChIP |            | (2)        |
| Spy_0858 | <i>xpt</i>   | xanthine<br>phosphoribosyltransferase                                          | -1.59 | -0.98 | RNAseq |              |            |            |
| Spy_0859 | -            | xanthine permease                                                              | -1.00 | -0.98 | RNAseq | LL37<br>ChIP |            |            |
| Spy_0874 | <i>gyrA</i>  | DNA gyrase subunit A                                                           |       |       |        |              |            |            |
| Spy_0913 | -            | putative<br>integrase/recombinase                                              |       |       |        |              |            | (3)        |
| Spy_0947 | <i>ciaH</i>  | sensor protein                                                                 |       |       |        | LL37<br>ChIP |            | (2)        |

|          |              |                                                         |       |       |        |              |            |         |
|----------|--------------|---------------------------------------------------------|-------|-------|--------|--------------|------------|---------|
| Spy_0978 | -            | Na(+)-linked D-alanine glycine permease                 | -1.06 |       | RNAseq | LL37<br>ChIP |            | (2)     |
| Spy_0981 | <i>cfa</i>   | cAMP factor                                             |       |       |        | LL37<br>ChIP |            | (2)     |
| Spy_0996 | <i>speA2</i> | enterotoxin                                             | 2.54  | 2.35  | RNAseq |              | Mg<br>ChIP | (14)    |
| Spy_1048 | -            | phage protein                                           |       |       |        | LL37<br>ChIP |            |         |
| Spy_1079 | -            | PTS system cellobiose-specific transporter subunit IIC  | 1.47  |       | RNAseq |              |            |         |
| Spy_1094 | -            | hypothetical protein                                    |       |       |        |              |            | (3)     |
| Spy_1106 | <i>grab</i>  | protein G-related alpha 2M-binding protein              |       | 2.79  |        | LL37<br>ChIP | Mg<br>ChIP | (2, 3)  |
| Spy_1114 | -            | hypothetical protein                                    | 1.53  | 1.75  | RNAseq | LL37<br>ChIP |            |         |
| Spy_1119 | <i>gapN</i>  | NADP-dependent glyceraldehyde-3-phosphate dehydrogenase |       |       |        | LL37<br>ChIP |            | (2)     |
| Spy_1137 | -            | putative transcription factor                           |       |       |        |              |            | (2)     |
| Spy_1139 | <i>nagB</i>  | glucosamine-6-phosphate isomerase                       | -2.37 |       | RNAseq | LL37<br>ChIP | Mg<br>ChIP |         |
| Spy_1152 | -            | putative cation (K+) transport protein                  |       |       |        |              |            |         |
| Spy_1155 | <i>prfC</i>  | peptide chain release factor 3                          |       |       |        | LL37<br>ChIP |            | (2)     |
| Spy_1169 | <i>spd3</i>  | DNase                                                   | 1.23  | 1.07  | RNAseq | LL37<br>ChIP |            | (2, 14) |
| Spy_1170 | -            | hypothetical protein                                    | 1.15  | 1.03  | RNAseq |              |            |         |
| Spy_1171 | -            | conserved hypothetical protein, phage associated        |       |       |        |              |            | (3)     |
| Spy_1200 | -            | conserved hypothetical protein, phage associated        |       |       |        |              |            | (3)     |
| Spy_1237 | <i>artP</i>  | arginine transport ATP-binding protein                  |       |       | RNAseq |              |            |         |
| Spy_1238 | <i>artQ</i>  | arginine transporter permease                           | -1.16 | -1.35 | RNAseq |              |            |         |
| Spy_1267 | <i>ktdB</i>  | putative 3-deoxy-D-manno-octulosonic-acid transferase   |       |       |        |              |            | (3)     |

|          |              |                                                       |       |       |        |              |            |        |
|----------|--------------|-------------------------------------------------------|-------|-------|--------|--------------|------------|--------|
| Spy_1269 | <i>asnA</i>  | putative asparagine synthase A                        |       |       |        | LL37<br>ChIP |            | (3)    |
| Spy_1274 | -            | acetyltransferase                                     | 1.28  | 1.74  | RNAseq |              |            |        |
| Spy_1284 | <i>ccdA</i>  | putative cytochrome C-type biogenesis protein         |       |       |        |              |            | (3)    |
| Spy_1290 | -            | hypothetical protein                                  | 2.23  | 1.44  | RNAseq | LL37<br>ChIP |            |        |
| Spy_1291 | -            | ATP-dependent RNA helicase                            | 3.50  | 2.61  | RNAseq |              | Mg<br>ChIP |        |
| Spy_1305 | <i>lytR</i>  | putative two-component sensor response regulator      |       |       |        |              |            | (2)    |
| Spy_1320 | -            | hypothetical protein rexA                             |       |       |        |              |            | (3)    |
| Spy_1329 | <i>cysM</i>  | putative O-acetylserine lyase                         |       |       |        |              |            | (3)    |
| Spy_1386 | -            | hypothetical protein                                  |       |       |        |              | Mg<br>ChIP | (2)    |
| Spy_1401 | -            | PTS system galactose-specific transporter subunit IIA | 1.11  | 2.26  | RNAseq |              |            | (3)    |
| Spy_1407 | -            | esterase                                              | 1.43  | 2.64  | RNAseq |              | Mg<br>ChIP | (14)   |
| Spy_1411 | -            | hypothetical protein                                  |       |       |        |              |            | (2, 3) |
| Spy_1415 | <i>sdaD2</i> | phage-encoded DNase                                   | 3.28  | 3.54  | RNAseq |              |            | (14)   |
| Spy_1472 | <i>hit</i>   | bis(5'-nucleosyl)-tetraphosphatase (asymmetrical)     |       |       |        | RNAseq       |            |        |
| Spy_1473 | -            | hypothetical protein                                  | 1.34  | 1.14  | RNAseq |              |            |        |
| Spy_1477 | -            | guanine-hypoxanthine permease                         | -1.87 | -1.99 | RNAseq |              |            | (2)    |
| Spy_1479 | <i>manL</i>  | PTS system mannose-specific transporter subunit IIAB  |       |       |        | LL37<br>ChIP |            | (2)    |
| Spy_1492 | <i>fabK</i>  | enoyl-ACP reductase                                   | -1.01 |       |        | RNAseq       | Mg<br>ChIP | (2)    |
| Spy_1499 | <i>grpE</i>  | putative Hsp-70 cofactor                              |       |       |        |              |            | (2, 3) |
| Spy_1503 | -            | phosphoglycerate mutase                               |       |       |        | LL37<br>ChIP |            |        |
| Spy_1504 | -            | hypothetical protein                                  |       |       |        | LL37<br>ChIP |            | (2)    |
| Spy_1512 | <i>codY</i>  | transcriptional repressor CodY                        |       |       |        | LL37<br>ChIP | Mg<br>ChIP |        |

|          |               |                                                             |       |      |        |              |            |        |
|----------|---------------|-------------------------------------------------------------|-------|------|--------|--------------|------------|--------|
| Spy_1513 | -             | aminotransferase                                            |       |      |        | LL37<br>ChIP |            |        |
| Spy_1514 | -             | universal stress protein                                    |       |      |        | LL37<br>ChIP |            | (2)    |
| Spy_1524 | -             | putative ABC transporter<br>(ATP-binding protein)           |       |      |        |              |            | (2, 3) |
| Spy_1525 | -             | putative ABC transporter<br>(ATP-binding protein)           |       |      |        |              |            | (2, 3) |
| Spy_1526 |               | putative ABC transporter<br>(ATP-binding protein)           |       |      |        |              |            | (3)    |
| Spy_1527 |               | putative ABC transporter<br>(permease)                      |       |      |        |              |            |        |
| Spy_1528 | -             | ferrichrome-binding<br>protein                              | -1.83 |      | RNAseq |              |            | (2)    |
| Spy_1531 | <i>isp2</i>   | hypothetical protein                                        | 1.99  | 2.12 | RNAseq | LL37<br>ChIP |            | (2)    |
| Spy_1540 | <i>endoS</i>  | endo-beta-N-<br>acetylglucosaminidase F2                    | -1.29 |      | RNAseq |              | Mg<br>ChIP | (2)    |
| Spy_1545 | <i>nusB</i>   | putative transcriptional<br>terminator                      |       |      |        |              |            | (3)    |
| Spy_1556 | -             | hypothetical protein                                        | 3.89  | 3.84 | RNAseq | LL37<br>ChIP | Mg<br>ChIP |        |
| Spy_1557 | <i>mutY</i>   | A/G-specific adenine<br>glycosylase                         |       |      | RNAseq | LL37<br>ChIP | Mg<br>ChIP | (2)    |
| Spy_1573 | <i>glpF.2</i> | glycerol uptake facilitator<br>protein                      | -1.06 |      | RNAseq |              |            |        |
| Spy_1578 | -             | Cro/Ci family<br>transcriptional regulator                  |       |      |        | LL37<br>ChIP | Mg<br>ChIP |        |
| Spy_1579 | -             | transcriptional regulator                                   |       |      |        | LL37<br>ChIP | Mg<br>ChIP |        |
| Spy_1601 | -             | membrane protease                                           |       |      |        |              | Mg<br>ChIP | (2)    |
| Spy_1607 | <i>fba</i>    | fructose-bisphosphate<br>aldolase                           |       |      |        |              |            | (14)   |
| Spy_1635 | <i>lacD.2</i> | putative tagatose 1,6-<br>diphosphate aldolase              |       |      |        |              |            | (2, 3) |
| Spy_1636 | <i>lacC.2</i> | putative galactose-6-<br>phosphate isomerase (C<br>subunit) |       |      |        |              |            | (2, 3) |
| Spy_1637 | <i>lacB.2</i> | putative galactose-6-<br>phosphate isomerase (B<br>subunit) |       |      |        |              |            | (2, 3) |

|          |                |                                              |       |       |        |              |            |         |
|----------|----------------|----------------------------------------------|-------|-------|--------|--------------|------------|---------|
| Spy_1638 | <i>lacA</i>    | galactose-6-phosphate isomerase subunit LacA |       |       |        | LL37<br>ChIP |            | (2, 3)  |
| Spy_1646 | <i>prsI</i>    | 30S ribosomal protein S9                     |       |       | RNAseq |              |            |         |
| Spy_1647 | <i>rplM</i>    | 50S ribosomal protein L13                    | -1.08 |       | RNAseq |              |            |         |
| Spy_1649 | -              | Putative transcription regulator             |       |       |        |              |            | (3)     |
| Spy_1673 | <i>proS</i>    | prolyl-tRNA synthetase                       |       |       |        |              |            |         |
| Spy_1680 | <i>pulA</i>    | Pullulanase                                  |       |       |        |              |            |         |
| Spy_1684 | <i>ska</i>     | streptokinase                                | 4.32  | 4.29  | RNAseq | LL37<br>ChIP | Mg<br>ChIP | (2, 3)  |
| Spy_1687 | <i>sclA</i>    | collagen-like surface protein                | 7.75  |       | RNAseq |              |            | (14)    |
| Spy_1702 | <i>smeZ</i>    | mitogenic exotoxin Z                         |       |       |        |              | Mg<br>ChIP | (2)     |
| Spy_1704 | <i>dppA</i>    | dipeptide-binding protein                    | -1.93 | -2.52 | RNAseq | LL37<br>ChIP | Mg<br>ChIP | (2, 14) |
| Spy_1709 | -              | hypothetical protein                         | 1.13  |       | RNAseq |              |            |         |
| Spy_1711 | <i>lmb</i>     | putative laminin adhesion                    |       |       |        |              |            | (2)     |
| Spy_1714 | -              | cell surface protein                         | 1.53  | 1.73  | RNAseq |              |            | (2)     |
| Spy_1715 | <i>scpA</i>    | C5A peptidase                                | 1.76  | 1.92  | RNAseq |              | Mg<br>ChIP | (2, 14) |
| Spy_1718 | <i>sic1.01</i> | inhibitor of complement protein              | 2.99  | 3.79  | RNAseq | LL37<br>ChIP | Mg<br>ChIP | (2, 14) |
| Spy_1719 | <i>emm1.0</i>  | M protein                                    |       |       |        |              | Mg<br>ChIP | (2, 14) |
| Spy_1720 | <i>mga</i>     | trans-acting positive regulator              |       |       |        | LL37<br>ChIP | Mg<br>ChIP | (2, 14) |
| Spy_1724 | <i>irr</i>     | putative two-component response regulator    |       |       |        |              |            | (2)     |
| Spy_1731 | -              | hypothetical protein                         | 2.29  | 2.45  | RNAseq |              |            |         |
| Spy_1732 | <i>prsA</i>    | foldase PrsA                                 | -1.08 |       | RNAseq |              |            | (2)     |
| Spy_1733 | -              | hypothetical protein                         | 3.69  | 1.05  | RNAseq |              |            |         |
| Spy_1735 | <i>speB</i>    | exotoxin B                                   |       | 1.18  |        | LL37<br>ChIP | Mg<br>ChIP | (2)     |
| Spy_1737 | <i>ropB</i>    | transcriptional regulator                    |       |       |        |              | Mg<br>ChIP | (2)     |
| Spy_1738 | <i>spd</i>     | phage-associated deoxyribonuclease           | 2.00  | 2.25  | RNAseq | LL37<br>ChIP | Mg<br>ChIP | (2, 3)  |
| Spy_1757 | -              | hypothetical protein                         |       |       |        | LL37<br>ChIP |            | (2)     |
| Spy_1758 | -              | dipeptidase B                                |       | 1.81  |        | LL37<br>ChIP |            | (2)     |



|          |             |                                             |       |      |        |              |            |            |
|----------|-------------|---------------------------------------------|-------|------|--------|--------------|------------|------------|
| Spy_1768 | <i>ahpC</i> | peroxiredoxin reductase (NAD(P)H)           |       |      |        | LL37<br>ChIP | Mg<br>ChIP | (2)        |
| Spy_1782 | <i>pepO</i> | neutral endopeptidase                       | 1.56  | 1.52 | RNAseq |              | Mg<br>ChIP |            |
| Spy_1794 | -           | hypothetical protein                        |       |      |        |              | Mg<br>ChIP |            |
| Spy_1799 | <i>recA</i> | recombination protein                       |       |      |        | LL37<br>ChIP | Mg<br>ChIP |            |
| Spy_1825 | -           | PadR family transcriptional regulator       |       |      |        |              | Mg<br>ChIP | (2)        |
| Spy_1839 | -           | MutT/nudix family protein                   | -1.15 |      | RNAseq |              |            | (2)        |
| Spy_1842 | <i>sdhA</i> | putative L-serine dehydratase alpha subunit |       |      |        |              |            | (3)        |
| Spy_1843 | -           | transglycosylase                            |       |      |        | LL37<br>ChIP | Mg<br>ChIP | (3)        |
| Spy_1851 | <i>hasA</i> | hyaluronan synthase                         | 6.41  | 7.18 | RNAseq | LL37<br>ChIP | Mg<br>ChIP | (2, 3, 14) |
| Spy_1857 | <i>guaB</i> | inosine monophosphate dehydrogenase         |       |      |        |              |            | (3)        |

Shaded boxes indicate significant transcript change identified by NanoString, but not by RNAseq.

\*Gene locus numbers refer to MGAS5005 genome.
