# Supplementary material for: Identification of Group A Streptococcus Genes Directly Regulated by CsrRS and Novel Intermediate Regulators
Source: PubMed Central journal article supplement (PMC8406183; doi:10.1128/mbio.01642-21), 2021-07-13
Supplement: mbio.01642-21-st003.pdf [file mbio.01642-21-st003.pdf]

**Table S3. NanoString analysis of genes differentially transcribed in a CsrS H280A mutant or during growth of wild type strain 854 in the presence of 300 nM LL-37**

| Gene locus* | Gene Name    | Gene Product                                          | Log2-fold change H280A vs. WT | Log2-fold change LL37 vs. unsupplemented |
|-------------|--------------|-------------------------------------------------------|-------------------------------|------------------------------------------|
| Spy_1106    | <i>grab</i>  | protein G-related alpha 2M-binding protein            | -4.17                         | -1.3                                     |
| Spy_0146    | <i>metB</i>  | cystathionine beta-lyase                              | -3.8                          | -1.07                                    |
| Spy_0545    | <i>agaS</i>  | putative tagatose-6-phosphate aldose/ketose isomerase | -2.92                         | -1.04                                    |
| Spy_1152    | -            | putative cation (K+) transport protein                | -2.53                         | -0.68                                    |
| Spy_0598    | <i>mscL</i>  | large-conductance mechanosensitive channel            | -2.3                          | -0.72                                    |
| Spy_1737    | <i>ropB</i>  | transcription regulator                               | -2.06                         | -0.5                                     |
| Spy_0563    | <i>sagB</i>  | Streptolysin S synthesis protein                      | -2.01                         | 0.06                                     |
| Spy_0562    | <i>sagA</i>  | streptolysin S                                        | -1.92                         | -0.56                                    |
| Spy_0195    | -            | MarR family transcription regulator                   | -1.85                         | 0.4                                      |
| Spy_0529    | -            | (Fe-S)-binding protein                                | -1.6                          | -0.71                                    |
| Spy_1386    | -            | hypothetical protein                                  | -1.42                         | -0.79                                    |
| Spy_0981    | <i>cfa</i>   | cAMP factor                                           | -1.35                         | -0.61                                    |
| Spy_0473    | -            | multidrug resistance protein B                        | -1.24                         | -0.18                                    |
| Spy_0639    | <i>pyrR</i>  | putative pyrimidine regulatory protein                | -1.22                         | -0.25                                    |
| Spy_0157    | <i>opuAA</i> | glycine betaine transport ATP-binding protein         | -1.22                         | 0.09                                     |
| Spy_1169    | <i>spd3</i>  | DNase                                                 | -1.18                         | 1.19                                     |
| Spy_1735    | <i>speB</i>  | cysteine protease SpeB                                | -1.08                         | 0.29                                     |
| Spy_1269    | <i>asnA</i>  | putative asparagine synthase A                        | -1.05                         | -0.21                                    |
| Spy_1170    | -            | hypothetical protein                                  | -1.05                         | 1.11                                     |
| Spy_0622    | -            | methyltransferase                                     | -0.99                         | -0.49                                    |
| Spy_0551    | <i>rpIS</i>  | 50S ribosomal protein L19                             | -0.98                         | -0.43                                    |
| Spy_1473    | -            | hypothetical protein                                  | 1.03                          | 0.47                                     |
| Spy_1579    | -            | transcription regulator                               | 1.04                          | 0.41                                     |
| Spy_0474    | <i>licT</i>  | BglG family transcription antiterminator              | 1.07                          | 0.42                                     |
| Spy_0180    | -            | murein endopeptidase                                  | 1.22                          | 0.56                                     |
| Spy_1525    | -            | putative ABC transporter (ATP-binding protein)        | 1.27                          | 0.54                                     |
| Spy_0475    | -            | beta-glucoside permease IIABC component               | 1.33                          | 0.47                                     |

|          |                  |                                                |      |      |
|----------|------------------|------------------------------------------------|------|------|
| Spy_0476 | <i>bglA</i>      | beta-glucosidase                               | 1.36 | 0.34 |
| Spy_0034 | -                | transcription regulator                        | 1.45 | 1.3  |
| Spy_1782 | <i>pepO</i>      | neutral endopeptidase                          | 1.48 | 0.59 |
| Spy_1526 | -                | putative ABC transporter (ATP-binding protein) | 1.53 | 0.72 |
| Spy_1557 | <i>mutY</i>      | A/G-specific adenine glycosylase               | 1.64 | 0.87 |
| Spy_1291 | -                | ATP-dependent RNA helicase                     | 1.64 | 1.34 |
| Spy_1684 | <i>ska</i>       | streptokinase                                  | 1.64 | 1.57 |
| Spy_1528 | -                | ferrichrome-binding protein                    | 1.68 | 0.74 |
| Spy_1714 | -                | cell surface protein                           | 1.87 | 1.24 |
| Spy_1731 | -                | hypothetical protein                           | 2.1  | 0.8  |
| Spy_1715 | <i>scpA</i>      | C5A peptidase                                  | 2.17 | 1.39 |
| Spy_0777 | -                | hypothetical protein                           | 2.18 | 0.22 |
| Spy_0356 | <i>speJ</i>      | pyrogenic exotoxin type J                      | 2.23 | 0.81 |
| Spy_0357 | -                | hypothetical protein                           | 2.46 | 1.01 |
| Spy_0186 | -                | transcription regulator                        | 2.55 | 1.25 |
| Spy_0142 | -                | hypothetical protein                           | 2.66 | 1.87 |
| Spy_0354 | -                | hypothetical protein                           | 3.04 | 0.96 |
| Spy_1556 | -                | hypothetical protein                           | 3.08 | 1.04 |
| Spy_0996 | <i>speA2</i>     | enterotoxin                                    | 3.08 | 1.1  |
| Spy_0141 | <i>slo</i>       | streptolysin O                                 | 3.11 | 2.17 |
| Spy_1415 | <i>sdaD2</i>     | phage-encoded DNase                            | 3.18 | 2.03 |
| Spy_0140 | <i>ifs</i>       | NADase inhibitor                               | 3.21 | 2.05 |
| Spy_0351 | <i>spyA</i>      | C3 family ADP-ribosyltransferase               | 3.25 | 1.89 |
| Spy_0139 | <i>nga</i>       | NAD glycohydrolase                             | 3.45 | 2.25 |
| Spy_1718 | <i>sic1.01</i>   | inhibitor of complement protein                | 3.71 | 2.14 |
| Spy_1407 | -                | esterase                                       | 4.82 | 2.38 |
| Spy_0341 | <i>scpC/prtS</i> | IL-8 protease                                  | 4.87 | 1.54 |
| Spy_0113 | -                | transposase                                    | 5.1  | 1.65 |
| Spy_0143 | -                | hypothetical protein                           | 5.28 | 2.2  |
| Spy_0668 | <i>mac</i>       | IgG-degrading protease                         | 5.8  | 1.89 |
| Spy_0352 | -                | hypothetical protein                           | 5.91 | 2.99 |
| Spy_0355 | -                | hypothetical protein                           | 6.09 | 3.45 |
| Spy_1851 | <i>hasA</i>      | hyaluronan synthase                            | 6.31 | 3.13 |
| Spy_0115 | -                | hypothetical protein                           | 7.28 | 3.29 |
| Spy_0144 | -                | hypothetical protein                           | 7.62 | 4.1  |

Genes are listed for which a change in expression of 1 log<sub>2</sub>-fold or more, up or down, was observed in mutant strain 854 CsrS H280A compared to wild type 854.

Green or red shading is proportional to the degree of down- or up-regulation, respectively, in the mutant compared to wild type or during wild type growth in LL-37 compared to unsupplemented broth.

\*Gene locus numbers refer to MGAS5005 genome.
