# Supplementary material for: Identification of Group A Streptococcus Genes Directly Regulated by CsrRS and Novel Intermediate Regulators
Source: PubMed Central journal article supplement (PMC8406183; doi:10.1128/mbio.01642-21), 2021-07-13
Supplement: mbio.01642-21-st004.pdf [file mbio.01642-21-st004.pdf]

**Table S4. NanoString analysis of genes differentially transcribed in a CsrS T284A mutant or during growth of wild type strain 854 in the presence of 15 mM MgCl<sub>2</sub>**

| Gene locus* | Gene Name      | Gene Product                                          | Log2-fold change T284A vs. WT | Log2-fold change Mg vs. unsupplemented |
|-------------|----------------|-------------------------------------------------------|-------------------------------|----------------------------------------|
| Spy_0140    | <i>ifs</i>     | NADase inhibitor                                      | -4.02                         | -2.82                                  |
| Spy_0139    | <i>nga</i>     | NAD glycohydrolase                                    | -3.94                         | -2.77                                  |
| Spy_0141    | <i>slo</i>     | streptolysin O                                        | -3.77                         | -2.89                                  |
| Spy_1170    | -              | hypothetical protein                                  | -3.31                         | -1.71                                  |
| Spy_0563    | <i>sagB</i>    | Streptolysin S synthesis protein                      | -3.3                          | -1.81                                  |
| Spy_1169    | <i>spd3</i>    | DNase                                                 | -3.3                          | -1.64                                  |
| Spy_1684    | <i>ska</i>     | streptokinase                                         | -3.28                         | -1.84                                  |
| Spy_1714    | -              | cell surface protein                                  | -3.12                         | -1.4                                   |
| Spy_1718    | <i>sic1.01</i> | inhibitor of complement protein                       | -3.02                         | -1.54                                  |
| Spy_0562    | <i>sagA</i>    | streptolysin S                                        | -2.9                          | -1.63                                  |
| Spy_1715    | <i>scpA</i>    | C5A peptidase                                         | -2.79                         | -1.31                                  |
| Spy_1719    | <i>emm1.0</i>  | M protein                                             | -2.3                          | -0.64                                  |
| Spy_1415    | <i>sdaD2</i>   | phage-encoded DNase                                   | -2.28                         | -1.8                                   |
| Spy_1687    | <i>sclA</i>    | hypothetical protein                                  | -2.19                         | -1.27                                  |
| Spy_0351    | <i>spyA</i>    | C3 family ADP-ribosyltransferase                      | -2.1                          | -1.37                                  |
| Spy_0561    | <i>epf</i>     | extracellular matrix binding protein                  | -1.95                         | -1.44                                  |
| Spy_1731    | -              | hypothetical protein                                  | -1.94                         | -0.5                                   |
| Spy_1704    | <i>dppA</i>    | dipeptide-binding protein                             | -1.82                         | -0.75                                  |
| Spy_0571    | -              | hypothetical protein                                  | -1.62                         | -0.93                                  |
| Spy_0635    | <i>rpmA</i>    | 50S ribosomal protein L27                             | -1.6                          | -0.65                                  |
| Spy_0142    | -              | hypothetical protein                                  | -1.56                         | -1.37                                  |
| Spy_0529    | -              | (Fe-S)-binding protein                                | -1.55                         | -0.6                                   |
| Spy_0622    | -              | methyltransferase                                     | -1.53                         | -0.78                                  |
| Spy_0639    | <i>pyrR</i>    | putative pyrimidine regulatory protein                | -1.49                         | -0.33                                  |
| Spy_0551    | <i>rplS</i>    | 50S ribosomal protein L19                             | -1.48                         | -0.58                                  |
| Spy_1386    | -              | hypothetical protein                                  | -1.45                         | -0.98                                  |
| Spy_1527    | -              | putative ABC transporter (permease)                   | -1.33                         | -0.77                                  |
| Spy_0545    | <i>agaS</i>    | putative tagatose-6-phosphate aldose/ketose isomerase | -1.22                         | -0.6                                   |
| Spy_0195    | -              | MarR family transcription regulator                   | -1.21                         | -0.18                                  |
| Spy_1556    | -              | hypothetical protein                                  | -1.2                          | -0.44                                  |
| Spy_0598    | <i>mscL</i>    | large-conductance mechanosensitive channel            | -1.16                         | -0.64                                  |
| Spy_0143    | -              | hypothetical protein                                  | -1.11                         | -0.85                                  |
| Spy_1290    | -              | hypothetical protein                                  | -1.07                         | -0.79                                  |
| Spy_0144    | -              | hypothetical protein                                  | -1.03                         | -1.04                                  |

|          |                  |                                                                      |       |       |
|----------|------------------|----------------------------------------------------------------------|-------|-------|
| Spy_1782 | <i>pepO</i>      | neutral endopeptidase                                                | -1.02 | -0.64 |
| Spy_1557 | <i>mutY</i>      | A/G-specific adenine glycosylase                                     | -1.02 | -0.31 |
| Spy_1407 | -                | esterase                                                             | -1.01 | -0.64 |
| Spy_1171 | -                | conserved hypothetical protein, phage associated                     | -0.99 | -0.91 |
| Spy_1738 | <i>spd/speMF</i> | phage-associated deoxyribonuclease                                   | -0.98 | -0.72 |
| Spy_1578 | -                | Cro/C1 family transcription regulator                                | -0.75 | -1    |
| Spy_1732 | <i>prsA</i>      | foldase PrsA                                                         | -0.38 | -1.31 |
| Spy_0157 | <i>opuAA</i>     | glycine betaine transport ATP-binding protein                        | 0.32  | 1.15  |
| Spy_0158 | <i>opuABC</i>    | glycine betaine-binding protein/glycine betaine transporter permease | 0.38  | 1.04  |
| Spy_1139 | <i>nagB</i>      | glucosamine-6-phosphate isomerase                                    | 0.5   | 1.36  |
| Spy_1137 | -                | putative transcription factor                                        | 0.6   | 1.06  |
| Spy_1499 | <i>grpE</i>      | putative Hsp-70 cofactor                                             | 0.76  | 1.05  |
| Spy_1733 | -                | hypothetical protein                                                 | 0.97  | -0.46 |
| Spy_0476 | <i>bglA</i>      | beta-glucosidase                                                     | 0.99  | 0.52  |
| Spy_1711 | <i>lmb</i>       | putative laminin adhesion                                            | 1     | 0.93  |
| Spy_0981 | <i>cfa</i>       | cAMP factor                                                          | 1.05  | 0.59  |
| Spy_0029 | <i>purD</i>      | phosphoribosylamine-glycine ligase                                   | 1.08  | 0.7   |
| Spy_1637 | <i>lacB.2</i>    | putative galactose-6-phosphate isomerase (B subunit)                 | 1.15  | 1.28  |
| Spy_0475 | -                | beta-glucoside permease IIABC component                              | 1.2   | 0.62  |
| Spy_1477 | -                | guanine-hypoxanthine permease                                        | 1.22  | 0.56  |
| Spy_1735 | <i>speB</i>      | cysteine protease SpeB                                               | 1.27  | -0.32 |
| Spy_1636 | <i>lacC.2</i>    | putative galactose-6-phosphate isomerase (C subunit)                 | 1.29  | 1.09  |
| Spy_0858 | <i>xpt</i>       | xanthine phosphoribosyltransferase                                   | 1.3   | 0.94  |
| Spy_0146 | <i>metB</i>      | cystathionine beta-lyase                                             | 1.36  | 0.83  |
| Spy_1638 | <i>lacA</i>      | galactose-6-phosphate isomerase subunit LacA                         | 1.42  | 1.09  |
| Spy_0859 | -                | xanthine permease                                                    | 1.73  | 0.84  |
| Spy_1401 | -                | putative PTS system, enzyme IIA component                            | 1.74  | 0.72  |
| Spy_1106 | <i>grab</i>      | protein G-related alpha 2M-binding protein                           | 2.21  | 1.72  |

Genes are listed for which a change in expression of 1 log<sub>2</sub>-fold or more, up or down, was observed in mutant strain 854 CsrS T284A compared to wild type 854.

Green or red shading is proportional to the degree of down- or up-regulation, respectively, in the mutant compared to wild type or during wild type growth in supplemental magnesium compared to unsupplemented broth.

\*Gene locus numbers refer to MGAS5005 genome.
