# Supplementary material for: Identification of Group A Streptococcus Genes Directly Regulated by CsrRS and Novel Intermediate Regulators
Source: PubMed Central journal article supplement (PMC8406183; doi:10.1128/mbio.01642-21), 2021-07-13
Supplement: mbio.01642-21-st005.pdf [file mbio.01642-21-st005.pdf]

**Table S5. ChIP seq analysis of CsrR binding in GAS strain 854 wild type grown in 15 mM MgCl<sub>2</sub>**

| Gene Locus*   | Gene name        | Gene product                                          | Fold enrichment | Peak Start | Peak End |
|---------------|------------------|-------------------------------------------------------|-----------------|------------|----------|
| Spy_0001      | <i>dnaA</i>      | chromosome replication initiator DnaA                 | 3.3             | 631        | 1005     |
| Spy_0010      | -                | beta-lactamase                                        | 4.94            | 9523       | 9761     |
| Spy_0014      | -                | amino acid permease                                   | 6.73            | 14816      | 15181    |
| Spy_0034      | -                | transcription regulator                               | 6               | 53024      | 53402    |
| Spy_0035      | <i>ruvB</i>      | Holliday junction DNA helicase RuvB                   | 3.6             | 54156      | 54440    |
| Spy_0083      | <i>rpoB</i>      | DNA-directed RNA polymerase subunit beta              | 9.55            | 93929      | 94181    |
| Spy_0115      | -                | hypothetical protein                                  | 12.56           | 126543     | 126848   |
| Spy_0135      | -                | hypothetical protein                                  | 4.41            | 145308     | 145550   |
| Spy_0139      | <i>nga</i>       | NAD glycohydrolase                                    | 3.54            | 149942     | 150259   |
| Spy_0142      | -                | hypothetical protein                                  | 5.1             | 153636     | 154062   |
| Spy_0143      | -                | hypothetical protein                                  | 27.59           | 154683     | 155221   |
| Spy_0144      | -                | hypothetical protein                                  | 39.55           | 155289     | 155652   |
| Spy_0145/0146 | <i>-/metB</i>    | hypothetical protein/cystathionine beta-lyase         | 6.83            | 155877     | 156343   |
| Spy_0148      | <i>ulaA</i>      | PTS system ascorbate-specific transporter subunit IIC | 4.82            | 160327     | 160523   |
| Spy_0160      | -                | CoA binding protein                                   | 5.49            | 174694     | 174913   |
| Spy_0176      | -                | hypothetical protein                                  | 3.23            | 186400     | 186684   |
| Spy_0182      | <i>speG</i>      | exotoxin type G                                       | 4.82            | 190616     | 190848   |
| Spy_0186      | -                | transcription regulator                               | 4.46            | 195406     | 195604   |
| Spy_0247      | -                | D-alanyl-D-alanine carboxypeptidase                   | 3.17            | 256680     | 256860   |
| Spy_0248/0249 | <i>dacA2</i>     | D-alanyl-D-alanine carboxypeptidase                   | 6.31            | 257175     | 257494   |
| Spy_0268      | -                | hypothetical protein                                  | 4.62            | 278480     | 278711   |
| Spy_0275      | -                | serine/threonine transporter SstT                     | 12.26           | 285303     | 285620   |
| Spy_0281      | -                | hypothetical protein                                  | 8.5             | 291445     | 291740   |
| Spy_0282      | <i>csrR</i>      | response regulator                                    | 4.03            | 291982     | 293049   |
| Spy_0283      | <i>csrS</i>      | transmembrane histidine kinase                        | 2.36            | 293243     | 293434   |
| Spy_0340      | <i>lctO</i>      | L-lactate oxidase                                     | 2.54            | 343382     | 343600   |
| Spy_0341      | <i>scpC/prtS</i> | IL-8 protease                                         | 15.24           | 344389     | 344790   |
| Spy_0351      | <i>spyA</i>      | C3 family ADP-ribosyltransferase                      | 18.49           | 358443     | 359060   |
| Spy_0354      | -                | hypothetical protein                                  | 16.25           | 360572     | 360879   |
| Spy_0355      | -                | hypothetical protein                                  | 9.1             | 361179     | 361687   |
| Spy_0356      | <i>speJ</i>      | exotoxin type J                                       | 7.88            | 362530     | 362744   |
| Spy_0357      | -                | hypothetical protein                                  | 5.88            | 516685     | 516882   |

|               |              |                                               |       |         |         |
|---------------|--------------|-----------------------------------------------|-------|---------|---------|
| Spy_0401/402  | -/-          | hypothetical protein/hypothetical protein     | 13.2  | 396371  | 396642  |
| Spy_0416      | -            | glutaminy-peptide cyclotransferase            | 2.89  | 409152  | 409391  |
| Spy_0444      | -            | hypothetical protein                          | 9.12  | 439504  | 439806  |
| Spy_0444      | -            | hypothetical protein                          | 3.67  | 440475  | 440708  |
| Spy_0495      | <i>lysS</i>  | lysyl-tRNA synthetase                         | 3.76  | 482215  | 482428  |
| Spy_0500/0501 | -            | N-acetylmuramoyl-L-alanine amidase            | 11.72 | 485868  | 486243  |
| Spy_0529      | -            | (Fe-S)-binding protein                        | 5.88  | 363494  | 363748  |
| Spy_0530      | <i>prfB</i>  | peptide chain release factor 2                | 2.8   | 517924  | 518046  |
| Spy_0561      | <i>epf</i>   | extracellular matrix binding protein          | 10.77 | 552284  | 552593  |
| Spy_0562      | <i>sagA</i>  | streptolysin S                                | 4.97  | 1826812 | 1827163 |
| Spy_0571      | -            | hypothetical protein                          | 9.91  | 567845  | 568105  |
| Spy_0607      | <i>rgpEc</i> | glycosyltransferase                           | 3.01  | 609691  | 609884  |
| Spy_0651      | -            | cell surface protein                          | 4.23  | 657909  | 658113  |
| Spy_0657      | <i>trxB</i>  | thioredoxin reductase                         | 4.82  | 662155  | 662583  |
| Spy_0668      | <i>mac</i>   | IgG-degrading protease                        | 9.46  | 672738  | 673011  |
| Spy_0692      | <i>engB</i>  | ribosome biogenesis GTP-binding protein YsxC  | 4.15  | 694349  | 694549  |
| Spy_0713      | <i>bcaT</i>  | branched-chain amino acid aminotransferase    | 6.96  | 717766  | 718011  |
| Spy_0715      | <i>rpsA</i>  | 30S ribosomal protein S1                      | 2.89  | 719297  | 719595  |
| Spy_0755      | <i>acol</i>  | dihydrolipoamide dehydrogenase                | 3.75  | 757723  | 757902  |
| Spy_0769      | -            | hypothetical protein                          | 3.74  | 772792  | 772928  |
| Spy_0777      | -            | hypothetical protein                          | 51.81 | 782066  | 782414  |
| Spy_0853      | -            | short chain dehydrogenase                     | 3.16  | 843924  | 844075  |
| Spy_0915      | <i>ffh</i>   | signal recognition particle subunit FFH/SRP54 | 2.47  | 902171  | 902289  |
| Spy_0963      | -            | hypothetical protein                          | 2.63  | 954063  | 954279  |
| Spy_0970      | -            | GntR family transcription regulator           | 5.94  | 958812  | 959015  |
| Spy_0981      | <i>cfa</i>   | cAMP factor                                   | 4.93  | 968980  | 969411  |
| Spy_0996      | <i>speA2</i> | enterotoxin                                   | 7.13  | 984116  | 984301  |
| Spy_1105      | -            | ribosomal-protein-alanine acetyltransferase   | 5.62  | 1079015 | 1079193 |
| Spy_1106      | <i>grab</i>  | protein G-related alpha 2M-binding protein    | 4.59  | 1079910 | 1080180 |
| Spy_1129      | -            | CAAX amino protease                           | 3.19  | 1105592 | 1105745 |
| Spy_1132      | <i>alaS</i>  | alanyl-tRNA synthetase                        | 4.49  | 1109602 | 1109726 |
| Spy_1136      | <i>pepB</i>  | oligoendopeptidase F                          | 2.4   | 1113833 | 1113967 |
| Spy_1139      | <i>nagB</i>  | glucosamine-6-phosphate isomerase             | 4.72  | 1117448 | 1117620 |

|               |                |                                                               |       |         |         |
|---------------|----------------|---------------------------------------------------------------|-------|---------|---------|
| Spy_1144      | -              | hypothetical protein                                          | 13.08 | 1120830 | 1121304 |
| Spy_1146      | <i>holA</i>    | DNA polymerase III subunit delta                              | 2.07  | 1123132 | 1123272 |
| Spy_1148      | -              | competence protein ComE                                       | 3     | 1125813 | 1125992 |
| Spy_1154      | <i>deaD</i>    | ATP-dependent RNA helicase                                    | 6.06  | 1132350 | 1132567 |
| Spy_1260      | -              | prepilin peptidase                                            | 3.58  | 1216487 | 1216705 |
| Spy_1280      | -              | two-component sensor kinase                                   | 2.3   | 1236536 | 1236719 |
| Spy_1291      | -              | ATP-dependent RNA helicase                                    | 6.3   | 1248013 | 1248376 |
| Spy_1307      | -              | hypothetical protein                                          | 2.81  | 1265578 | 1265750 |
| Spy_1322      | -              | hypothetical protein                                          | 7.35  | 1284786 | 1285531 |
| Spy_1341      | <i>gmk</i>     | guanylate kinase                                              | 3.53  | 1308366 | 1308588 |
| Spy_1363      | -              | amino acid ABC transporter permease                           | 2.59  | 1333102 | 1333273 |
| Spy_1386      | -              | hypothetical protein                                          | 10.07 | 1360412 | 1360627 |
| Spy_1389      | -              | sodium-dependent phosphate transporter                        | 2.49  | 1364847 | 1364998 |
| Spy_1390      | -              | hypothetical protein                                          | 3.94  | 1365414 | 1365625 |
| Spy_1407      | -              | esterase                                                      | 4.39  | 1377880 | 1378165 |
| Spy_1415      | <i>sdaD2</i>   | phage-encoded DNase                                           | 4.85  | 1385591 | 1385805 |
| Spy_1429      | -              | phage protein                                                 | 2.33  | 1401865 | 1401974 |
| Spy_1439      | -              | portal protein                                                | 3.11  | 1409157 | 1409429 |
| Spy_1492      | <i>fabK</i>    | enoyl-ACP reductase                                           | 2.93  | 1448608 | 1448880 |
| Spy_1512      | <i>codY</i>    | transcription repressor CodY                                  | 12.53 | 1465559 | 1465947 |
| Spy_1518      | -              | transporter                                                   | 3.52  | 1472269 | 1472629 |
| Spy_1539      | <i>scrK</i>    | fructokinase                                                  | 6.7   | 1498295 | 1498524 |
| Spy_1540      | <i>endoS</i>   | endo-beta-N-acetylglucosaminidase F2                          | 4.05  | 1501481 | 1501706 |
| Spy_1555      | <i>rpsF</i>    | 30S ribosomal protein S6                                      | 5.35  | 1515630 | 1515871 |
| Spy_1557      | <i>mutY</i>    | A/G-specific adenine glycosylase                              | 15.59 | 1516072 | 1516398 |
| Spy_1559      | <i>trx</i>     | thioredoxin                                                   | 3.36  | 1518733 | 1518942 |
| Spy_1578/1579 | -/-            | Cro/Ci family transcription regulator/transcription regulator | 10.2  | 1540204 | 1540629 |
| Spy_1601      | -              | membrane protease                                             | 5.64  | 1559797 | 1560031 |
| Spy_1684      | <i>ska</i>     | streptokinase                                                 | 14.69 | 1643866 | 1644494 |
| Spy_1689      | -              | hypothetical protein                                          | 14.04 | 1649601 | 1650004 |
| Spy_1702      | <i>smeZ</i>    | mitogenic exotoxin Z                                          | 3.96  | 1662198 | 1662439 |
| Spy_1704      | <i>dppA</i>    | dipeptide-binding protein                                     | 5.9   | 1663478 | 1663723 |
| Spy_1708      | <i>dppE</i>    | dipeptide transport ATP-binding protein                       | 6.28  | 1668630 | 1669091 |
| Spy_1715      | <i>scpA</i>    | C5A peptidase                                                 | 5.57  | 1678792 | 1679106 |
| Spy_1718      | <i>sic1.01</i> | inhibitor of complement protein                               | 9.74  | 1681790 | 1682081 |
| Spy_1718      | <i>sic1.01</i> | inhibitor of complement protein                               | 2.26  | 1682450 | 1683193 |
| Spy_1719      | <i>emm1.0</i>  | M protein                                                     | 6.25  | 1683443 | 1683762 |

|               |             |                                                               |       |         |         |
|---------------|-------------|---------------------------------------------------------------|-------|---------|---------|
| Spy_1720      | <i>mga</i>  | trans-acting positive regulator                               | 11.11 | 1685397 | 1686398 |
| Spy_1731      | -           | hypothetical protein                                          | 7.39  | 1694539 | 1694992 |
| Spy_1735      | <i>speB</i> | cysteine protease SpeB                                        | 3.18  | 1698328 | 1698815 |
| Spy_1737      | <i>ropB</i> | transcription regulator                                       | 4.06  | 1699076 | 1699329 |
| Spy_1738      | <i>spd</i>  | phage-associated deoxyribonuclease                            | 3.36  | 1701007 | 1701211 |
| Spy_1768      | <i>ahpC</i> | peroxiredoxin reductase (NAD(P)H)                             | 6.77  | 1728339 | 1728762 |
| Spy_1782      | <i>pepO</i> | neutral endopeptidase                                         | 2.67  | 1750153 | 1750292 |
| Spy_1793      | <i>nrdD</i> | anaerobic ribonucleoside triphosphate reductase               | 8.13  | 1762505 | 1762777 |
| Spy_1794      | -           | hypothetical protein                                          | 11.03 | 1763914 | 1764247 |
| Spy_1803      | <i>lmrP</i> | multidrug resistance protein B                                | 3.35  | 1771108 | 1771348 |
| Spy_1812      | -           | hypothetical protein                                          | 2.77  | 1781755 | 1782467 |
| Spy_1824/1825 | -/-         | mutT/nudix family protein/PadR family transcription regulator | 2.71  | 1791827 | 1792020 |
| Spy_1843      | -           | transglycosylase                                              | 6.99  | 1811167 | 1811557 |
| Spy_1849      | -           | zinc protease                                                 | 6.28  | 1816924 | 1817330 |
| Spy_1849      | -           | zinc protease                                                 | 2.28  | 1817437 | 1817633 |
| Spy_1851      | <i>hasA</i> | hyaluronan synthase                                           | 9.69  | 1818203 | 1819059 |
| Spy_1856      | -           | glucose uptake protein                                        | 3     | 1824932 | 1825305 |
| Spy_1857      | <i>guaB</i> | inosine 5'-monophosphate dehydrogenase                        | 4.97  | 559165  | 559575  |
| Spy_1857      | <i>guaB</i> | inosine 5'-monophosphate dehydrogenase                        | 4.44  | 1827452 | 1827695 |
| Spy_T0065     | -           | Asn tRNA                                                      | 7.68  | 1833765 | 1834257 |

Enrichment is determined with respect to the mock control. Greater than 2-fold enrichment is considered significant.

Genes are considered to be associated with a ChIP-seq peak if the translation start site is within 100 bp upstream to 500 bp downstream of the position of maximal enrichment.

Genes are listed multiple times if more than one ChIP-Seq peak was present within 100 bp upstream to 500 bp downstream of the transcription start site.

Multiple genes are listed for a single peak if that peak is within 100 bp upstream to 500 bp downstream of more than one gene.

\*Gene locus numbers refer to MGAS5005 genome.
