# Supplementary material for: Identification of Group A Streptococcus Genes Directly Regulated by CsrRS and Novel Intermediate Regulators
Source: PubMed Central journal article supplement (PMC8406183; doi:10.1128/mbio.01642-21), 2021-07-13
Supplement: mbio.01642-21-st006.pdf [file mbio.01642-21-st006.pdf]

**Table S6. ChIP seq analysis of CsrR binding in GAS strain 854 wild type grown in 300 nM LL-37**

| Gene Locus*   | Gene name     | Gene product                                           | Fold enrichment | Peak Start | Peak End |
|---------------|---------------|--------------------------------------------------------|-----------------|------------|----------|
| Spy_0001      | <i>dnaA</i>   | chromosome replication initiator DnaA                  | 2.2             | 285289     | 285629   |
| Spy_0003      | -             | hypothetical protein                                   | 3.84            | 552217     | 552580   |
| Spy_0007      | -             | heat shock protein 15                                  | 2.96            | 1728335    | 1728800  |
| Spy_0008      | <i>divIC</i>  | cell division protein                                  | 4.58            | 463509     | 463792   |
| Spy_0010      | -             | beta-lactamase                                         | 3.76            | 1132318    | 1132589  |
| Spy_0012      | <i>tisS</i>   | tRNA(Ile)-lysidine synthetase                          | 2.32            | 93923      | 94187    |
| Spy_0013      | <i>ftsH</i>   | cell division protein                                  | 5.44            | 439540     | 439828   |
| Spy_0014      | -             | amino acid permease                                    | 3.64            | 654754     | 654977   |
| Spy_0019      | <i>recO</i>   | DNA repair protein RecO                                | 7.4             | 1663469    | 1663725  |
| Spy_0024      | <i>purF</i>   | amidophosphoribosyltransferase                         | 3.77            | 1017458    | 1017702  |
| Spy_0032      | -             | hypothetical protein                                   | 5.61            | 292005     | 292729   |
| Spy_0032      | -             | hypothetical protein                                   | 4.45            | 411775     | 412088   |
| Spy_0034      | -             | transcription regulator                                | 3.69            | 361139     | 361409   |
| Spy_0034      | -             | transcription regulator                                | 3.58            | 559334     | 559545   |
| Spy_0034      | -             | transcription regulator                                | 2.96            | 1221701    | 1221955  |
| Spy_0036      | -             | protein tyrosine phosphatase                           | 6.86            | 1762497    | 1762792  |
| Spy_0038      | -             | acyltransferase                                        | 2.16            | 191034     | 191258   |
| Spy_0040      | <i>adhA</i>   | alcohol dehydrogenase                                  | 4.26            | 1435324    | 1435538  |
| Spy_0063      | <i>rplO</i>   | 50S ribosomal protein L15                              | 2.41            | 438932     | 439145   |
| Spy_0080      | -             | bis(5'-nucleosyl)-tetrphosphatase (asymmetrical)       | 2.57            | 717764     | 718004   |
| Spy_0082      | <i>pbp1b</i>  | multimodular transpeptidase-transglycosylase PBP 1B    | 3.34            | 600524     | 600735   |
| Spy_0083      | <i>rpoB</i>   | DNA-directed RNA polymerase subunit beta               | 17.23           | 1643948    | 1644440  |
| Spy_0105      | <i>hsIO</i>   | heat shock protein 33                                  | 4.57            | 1120865    | 1121305  |
| Spy_0106/107  | <i>rofA</i>   | transcription regulator                                | 4.3             | 1119797    | 1120000  |
| Spy_0115      | -             | hypothetical protein                                   | 3.31            | 765461     | 765697   |
| Spy_0135      | -             | hypothetical protein                                   | 7.83            | 662372     | 662600   |
| Spy_0141      | <i>slo</i>    | streptolysin O                                         | 3.27            | 1459082    | 1459271  |
| Spy_0143      | -             | hypothetical protein                                   | 4.56            | 812322     | 812558   |
| Spy_0144      | -             | hypothetical protein                                   | 3.96            | 145295     | 145559   |
| Spy_0145/0146 | <i>-/metB</i> | hypothetical protein/cystathionine beta-lyase          | 3.72            | 1293655    | 1293905  |
| Spy_0148      | <i>ulaA</i>   | PTS system ascorbate-specific transporter subunit IIC  | 3.95            | 34036      | 34235    |
| Spy_0163      | -             | 3'-phosphoadenosine 5'-phosphosulfate sulfotransferase | 2.92            | 968940     | 969180   |

|               |                  |                                                                    |       |         |         |
|---------------|------------------|--------------------------------------------------------------------|-------|---------|---------|
| Spy_0182      | <i>speG</i>      | exotoxin type G                                                    | 9.12  | 672227  | 672425  |
| Spy_0182      | <i>speG</i>      | exotoxin type G                                                    | 5.84  | 1466913 | 1467161 |
| Spy_0186      | -                | transcription regulator                                            | 4.38  | 516662  | 516909  |
| Spy_0186      | -                | transcription regulator                                            | 4.18  | 55380   | 55611   |
| Spy_0195      | -                | MarR family transcription regulator                                | 3.59  | 674825  | 675052  |
| Spy_0206      | <i>fasA</i>      | response regulator                                                 | 2.35  | 1827449 | 1827711 |
| Spy_0207/0208 | <i>rnpA</i>      | ribonuclease P                                                     | 2.64  | 925664  | 925869  |
| Spy_0239      | <i>mecA</i>      | adaptor protein                                                    | 3.72  | 626187  | 626535  |
| Spy_0240      | -                | undecaprenyl-phosphate alpha-N-acetylglucosaminophosphotransferase | 4.25  | 937660  | 937757  |
| Spy_0248/0249 | <i>dacA2</i>     | D-alanyl-D-alanine carboxypeptidase                                | 6.08  | 1471694 | 1471940 |
| Spy_0251      | <i>oppC</i>      | oligopeptide transporter permease                                  | 3.28  | 1817087 | 1817320 |
| Spy_0263      | <i>nadD</i>      | nicotinic acid mononucleotide adenylyltransferase                  | 3.03  | 1133925 | 1134138 |
| Spy_0268      | -                | hypothetical protein                                               | 3.41  | 444827  | 444999  |
| Spy_0270      | -                | ABC transporter substrate-binding protein                          | 2.06  | 694331  | 694564  |
| Spy_0275      | -                | serine/threonine transporter SstT                                  | 23.46 | 257257  | 257492  |
| Spy_0282      | <i>csrR</i>      | response regulator                                                 | 13.78 | 1095447 | 1095632 |
| Spy_0282      | <i>csrR</i>      | response regulator                                                 | 2.15  | 905808  | 905934  |
| Spy_0288      | <i>snf</i>       | SWF/SNF family helicase                                            | 2.82  | 1171489 | 1171662 |
| Spy_0289      | -                | hypothetical protein                                               | 5.12  | 1602771 | 1603070 |
| Spy_0309      | <i>scpB</i>      | segregation and condensation protein B                             | 5.61  | 191517  | 191764  |
| Spy_0329      | -                | hypothetical protein                                               | 2.93  | 1490539 | 1490763 |
| Spy_0330      | <i>tmk</i>       | thymidylate kinase                                                 | 3.62  | 1811322 | 1811507 |
| Spy_0332      | -                | <i>tpl</i> protein                                                 | 4.27  | 394128  | 394269  |
| Spy_0340      | <i>lctO</i>      | L-lactate oxidase                                                  | 2.89  | 395542  | 395865  |
| Spy_0341      | <i>scpC/prtS</i> | IL-8 protease                                                      | 3.34  | 440278  | 440432  |
| Spy_0355      | -                | hypothetical protein                                               | 11.63 | 1554426 | 1554668 |
| Spy_0392      | -                | hypothetical protein                                               | 5.72  | 317091  | 317322  |
| Spy_0400      | <i>silD</i>      | hypothetical protein                                               | 5.71  | 50903   | 51151   |
| Spy_0419      | -                | permease                                                           | 12.35 | 12674   | 12925   |
| Spy_0420      | -                | glucosyltransferase                                                | 3.55  | 1364814 | 1365033 |
| Spy_0427      | <i>thrS</i>      | threonyl-tRNA synthetase                                           | 2.95  | 1081512 | 1081661 |
| Spy_0440      | -                | transcription regulator                                            | 4.81  | 528425  | 528608  |
| Spy_0440/0441 | -                | transcription regulator                                            | 2.63  | 495349  | 495559  |
| Spy_0443      | -                | hypothetical protein                                               | 9.08  | 1682461 | 1683029 |

|               |                  |                                                        |       |         |         |
|---------------|------------------|--------------------------------------------------------|-------|---------|---------|
| Spy_0444      | -                | hypothetical protein                                   | 16.41 | 1130064 | 1130247 |
| Spy_0444      | -                | hypothetical protein                                   | 5.66  | 891423  | 891615  |
| Spy_0446      | -                | hypothetical protein                                   | 4.79  | 887897  | 888075  |
| Spy_0449      | -                | UDP-glucose 6-dehydrogenase                            | 6.37  | 1685615 | 1685852 |
| Spy_0450      | <i>mefE</i>      | macrolide-efflux protein                               | 3.83  | 302118  | 302313  |
| Spy_0463      | -                | hypothetical protein                                   | 2.62  | 485891  | 486188  |
| Spy_0473/0474 | -                | multidrug resistance protein B                         | 19.3  | 691227  | 691385  |
| Spy_0500/0501 | -                | N-acetylmuramoyl-L-alanine amidase                     | 5.09  | 1015828 | 1015945 |
| Spy_0506      | <i>ftsW</i>      | cell division protein                                  | 3.33  | 1079913 | 1080091 |
| Spy_0509      | <i>tpiA</i>      | triosephosphate isomerase                              | 5.25  | 436192  | 436278  |
| Spy_0524      | <i>idnO</i>      | gluconate 5-dehydrogenase                              | 2.94  | 1465591 | 1465797 |
| Spy_0529      | -                | (Fe-S)-binding protein                                 | 6.94  | 442340  | 442509  |
| Spy_0530      | <i>prfB</i>      | peptide chain release factor 2                         | 3.29  | 1245622 | 1245775 |
| Spy_0539      | -                | hypothetical protein                                   | 5.3   | 660291  | 660458  |
| Spy_0560      | -                | transcription regulator                                | 3.23  | 1619652 | 1619900 |
| Spy_0561      | <i>epf</i>       | extracellular matrix binding protein                   | 22.42 | 1145931 | 1146273 |
| Spy_0562      | <i>sagA</i>      | streptolysin S                                         | 10.61 | 9089    | 9265    |
| Spy_0564      | <i>sagC</i>      | streptolysin S biosynthesis protein                    | 3.98  | 1698585 | 1698782 |
| Spy_0569      | <i>sagH</i>      | streptolysin S export transmembrane protein            | 2.61  | 116307  | 116558  |
| Spy_0580      | <i>atpG</i>      | ATP synthase FOF1 subunit gamma                        | 4.18  | 154829  | 155140  |
| Spy_0597      | <i>rpsU</i>      | 30S ribosomal protein S21                              | 8.5   | 1026189 | 1026344 |
| Spy_0598/0599 | <i>mscL/dnaG</i> | large-conductance mechanosensitive channel/DNA primase | 4.35  | 1764039 | 1764182 |
| Spy_0605      | <i>rgpCc</i>     | polysaccharide export ABC transporter permease         | 2.8   | 50397   | 50599   |
| Spy_0614      | <i>pepT</i>      | peptidase T                                            | 2.68  | 1089425 | 1089546 |
| Spy_0620      | <i>rpml</i>      | 50S ribosomal protein L35                              | 2.85  | 1473824 | 1474062 |
| Spy_0622/0623 | -                | phosphoglycerol transferase                            | 6.62  | 195464  | 195593  |
| Spy_0636      | -                | LysR family transcription regulator                    | 2.97  | 601016  | 601205  |
| Spy_0641      | <i>pyrB</i>      | aspartate carbamoyltransferase                         | 3.03  | 757707  | 757912  |
| Spy_0644      | -                | periplasmic protein of efflux system                   | 2.9   | 117043  | 117339  |
| Spy_0648      | <i>rpsP</i>      | 30S ribosomal protein S16                              | 3.59  | 339168  | 339330  |
| Spy_0651      | -                | cell surface protein                                   | 16.08 | 61132   | 61361   |

|               |                  |                                                                                         |      |         |         |
|---------------|------------------|-----------------------------------------------------------------------------------------|------|---------|---------|
| Spy_0654      | -                | TetR family transcription regulator                                                     | 4.69 | 248143  | 248375  |
| Spy_0657      | <i>trxB</i>      | thioredoxin reductase                                                                   | 8.1  | 1333086 | 1333281 |
| Spy_0668      | <i>mac</i>       | IgG-degrading protease                                                                  | 7.17 | 1765799 | 1765983 |
| Spy_0668      | <i>mac</i>       | IgG-degrading protease                                                                  | 3.59 | 579759  | 579959  |
| Spy_0673      | <i>papS</i>      | tRNA CCA-pyrophosphorylase                                                              | 6.83 | 823341  | 823513  |
| Spy_0687/688  | <i>mvaS.1</i>    | hydroxymethylglutaryl-CoA synthase                                                      | 4.99 | 195757  | 196018  |
| Spy_0692      | <i>engB</i>      | ribosome biogenesis GTP-binding protein YsxC                                            | 6.12 | 1365396 | 1365626 |
| Spy_0713      | <i>bcaT</i>      | branched-chain amino acid aminotransferase                                              | 8.83 | 1145072 | 1145254 |
| Spy_0724      | -                | hypothetical protein                                                                    | 2.45 | 898721  | 898794  |
| Spy_0755      | <i>acol</i>      | dihydrolipoamide dehydrogenase                                                          | 4.31 | 1409150 | 1409382 |
| Spy_0760/0761 | -/-              | UDP-N-acetylmuramoylalanyl-D-glutamate--2,6-diaminopimelate ligase/hypothetical protein | 8.17 | 1037465 | 1037533 |
| Spy_0817      | <i>dacA1</i>     | D-alanyl-D-alanine carboxypeptidase                                                     | 7.95 | 561267  | 561412  |
| Spy_0830      | <i>dpiA</i>      | transcription regulatory protein                                                        | 4.18 | 1635541 | 1635740 |
| Spy_0831/0832 | <i>dpiB/malP</i> | sensor kinase/malate-sodium symport                                                     | 3.5  | 155425  | 155586  |
| Spy_0834      | -                | Zn-dependent alcohol dehydrogenase and related dehydrogenase                            | 2.09 | 160338  | 160501  |
| Spy_0847      | -                | GTP pyrophosphokinase                                                                   | 3.47 | 1219922 | 1220098 |
| Spy_0853      | -                | short chain dehydrogenase                                                               | 2.96 | 3205    | 3396    |
| Spy_0859      | -                | xanthine permease                                                                       | 3.26 | 445530  | 445848  |
| Spy_0899      | <i>citG</i>      | GntR family transcription regulator                                                     | 5.19 | 1718048 | 1718188 |
| Spy_0903      | <i>oadB</i>      | oxaloacetate decarboxylase subunit beta                                                 | 5.21 | 1035247 | 1035435 |
| Spy_0911/0912 | -/-              | hypothetical protein/hypothetical protein                                               | 4.11 | 1457292 | 1457530 |
| Spy_0915      | <i>ffh</i>       | signal recognition particle subunit FFH/SRP54                                           | 3.45 | 1818435 | 1818787 |
| Spy_0918/0919 | -/ <i>guaA</i>   | hypothetical protein/GMP synthase                                                       | 5.93 | 40880   | 41072   |
| Spy_0925      | <i>rnhB</i>      | anaerobic ribonucleoside-triphosphate reductase                                         | 3.59 | 1321057 | 1321149 |
| Spy_0936      | <i>dfp</i>       | phosphopantothienoylcysteine decarboxylase                                              | 6.66 | 9568    | 9658    |

|          |             |                                                                          |       |         |         |
|----------|-------------|--------------------------------------------------------------------------|-------|---------|---------|
| Spy_0947 | <i>ciaH</i> | sensor protein                                                           | 6.61  | 247368  | 247626  |
| Spy_0963 | -           | hypothetical protein                                                     | 3.33  | 155939  | 156350  |
| Spy_0970 | -           | GntR family transcription regulator                                      | 3.7   | 959272  | 959388  |
| Spy_0981 | <i>cfa</i>  | cAMP factor                                                              | 7.17  | 53009   | 53246   |
| Spy_1019 | -           | phage scaffold protein                                                   | 2.59  | 1799797 | 1799955 |
| Spy_1043 | -           | phage protein                                                            | 4.98  | 1753949 | 1754149 |
| Spy_1048 | -           | phage protein                                                            | 15.45 | 1308382 | 1308546 |
| Spy_1056 | <i>malM</i> | 4-alpha-glucanotransferase                                               | 4.55  | 14996   | 15225   |
| Spy_1063 | <i>malD</i> | maltodextrin transporter permease                                        | 3.82  | 337579  | 337791  |
| Spy_1063 | <i>malD</i> | maltodextrin transporter permease                                        | 2.64  | 672788  | 672988  |
| Spy_1065 | <i>amyA</i> | alpha-amylase                                                            | 3.98  | 653996  | 654141  |
| Spy_1106 | <i>grab</i> | protein G-related alpha 2M-binding protein                               | 4.95  | 913342  | 913403  |
| Spy_1107 | <i>murZ</i> | UDP-N-acetylglucosamine 1-carboxyvinyltransferase                        | 5.38  | 200329  | 200538  |
| Spy_1114 | -           | hypothetical protein                                                     | 4.4   | 53966   | 54102   |
| Spy_1119 | <i>gapN</i> | NADP-dependent glyceraldehyde-3-phosphate dehydrogenase                  | 6.02  | 413147  | 413347  |
| Spy_1139 | <i>nagB</i> | glucosamine-6-phosphate isomerase                                        | 2.76  | 825799  | 825905  |
| Spy_1142 | -           | hypothetical protein                                                     | 8.28  | 840838  | 840914  |
| Spy_1144 | -           | hypothetical protein                                                     | 8.33  | 902140  | 902304  |
| Spy_1153 | -           | kup system potassium uptake protein                                      | 5.21  | 278549  | 278721  |
| Spy_1154 | <i>deaD</i> | ATP-dependent RNA helicase                                               | 18.24 | 1825059 | 1825316 |
| Spy_1155 | <i>prfC</i> | peptide chain release factor 3                                           | 6.53  | 1268883 | 1269129 |
| Spy_1157 | <i>murF</i> | UDP-N-acetylmuramoylalanine-D-glutamyl-lysine--D-alanyl-D-alanine ligase | 2.75  | 344517  | 344698  |
| Spy_1158 | <i>ddl</i>  | D-alanyl-alanine synthetase A                                            | 2.94  | 1265566 | 1265820 |
| Spy_1167 | -           | lead, cadmium, zinc and mercury transporting ATPase                      | 4.13  | 93460   | 93690   |
| Spy_1169 | <i>spd3</i> | DNase                                                                    | 4.64  | 492597  | 492831  |
| Spy_1209 | -           | DNA replication protein                                                  | 5.9   | 954062  | 954354  |
| Spy_1233 | <i>xseA</i> | exodeoxyribonuclease VII large subunit                                   | 2.31  | 1236542 | 1236707 |
| Spy_1264 | -           | ribose operon repressor                                                  | 3.86  | 126617  | 126863  |
| Spy_1266 | -           | ATP-dependent protease La                                                | 10.25 | 518270  | 518346  |
| Spy_1269 | <i>asnA</i> | asparagine synthetase AsnA                                               | 2.73  | 1385594 | 1385782 |

|               |              |                                                         |      |         |         |
|---------------|--------------|---------------------------------------------------------|------|---------|---------|
| Spy_1280      | -            | two-component sensor kinase                             | 3.32 | 260833  | 261015  |
| Spy_1290      | -            | hypothetical protein                                    | 4.69 | 151657  | 151983  |
| Spy_1307      | -            | hypothetical protein                                    | 3.34 | 849818  | 849894  |
| Spy_1307      | -            | hypothetical protein                                    | 2.59 | 551812  | 551990  |
| Spy_1309      | -            | sugar transporter permease                              | 2.85 | 1375304 | 1375499 |
| Spy_1310      | -            | sugar transporter permease                              | 3.37 | 1512396 | 1512533 |
| Spy_1322      | -            | hypothetical protein                                    | 2.89 | 1808547 | 1808709 |
| Spy_1327      | <i>comFA</i> | competence protein ComF                                 | 7.41 | 1410215 | 1410373 |
| Spy_1341      | <i>gmk</i>   | guanylate kinase                                        | 3.65 | 643928  | 644097  |
| Spy_1353      | -            | hypothetical protein                                    | 3.77 | 274705  | 274894  |
| Spy_1358      | <i>nadE</i>  | nicotinate<br>phosphoribosyltransferase                 | 2.22 | 639288  | 639462  |
| Spy_1363      | -            | amino acid ABC transporter<br>permease                  | 4.25 | 53651   | 53821   |
| Spy_1389      | -            | sodium-dependent phosphate<br>transporter               | 5.39 | 843915  | 844087  |
| Spy_1390      | -            | hypothetical protein                                    | 4.15 | 8698    | 8787    |
| Spy_1403      | -            | copper chaperone                                        | 3.18 | 418844  | 419008  |
| Spy_1415      | <i>sdaD2</i> | phage-encoded DNase                                     | 3.28 | 1137443 | 1137570 |
| Spy_1434      | -            | phage protein                                           | 2.68 | 511936  | 512019  |
| Spy_1439      | -            | portal protein                                          | 4.02 | 336616  | 336701  |
| Spy_1439      | -            | portal protein                                          | 2.31 | 1557961 | 1558161 |
| Spy_1440      | -            | terminase large subunit                                 | 3.04 | 1668645 | 1668851 |
| Spy_1479      | <i>manL</i>  | PTS system mannose-specific<br>transporter subunit IIAB | 9.09 | 177515  | 177676  |
| Spy_1496      | <i>phaB</i>  | enoyl-CoA hydratase                                     | 2.08 | 649597  | 649759  |
| Spy_1501      | -            | N-acetylmuramoyl-L-alanine<br>amidase                   | 3.82 | 343362  | 343570  |
| Spy_1503      | -            | phosphoglycerate mutase                                 | 8.01 | 1285057 | 1285190 |
| Spy_1504      | -            | hypothetical protein                                    | 2.85 | 1459480 | 1459606 |
| Spy_1512      | <i>codY</i>  | transcription repressor CodY                            | 4.8  | 1267634 | 1267818 |
| Spy_1513/1514 | -/-          | aminotransferase/universal stress<br>protein            | 7.14 | 623952  | 624056  |
| Spy_1517      | -            | lantibiotic transport permease                          | 6.59 | 299394  | 299543  |
| Spy_1518      | -            | transporter                                             | 2.64 | 608240  | 608304  |
| Spy_1519      | <i>recG</i>  | ATP-dependent DNA helicase<br>RecG                      | 4.39 | 1809352 | 1809487 |
| Spy_1531      | <i>isp2</i>  | hypothetical protein                                    | 5.78 | 1118092 | 1118286 |
| Spy_1534      | <i>secA</i>  | preprotein translocase subunit<br>SecA                  | 2.43 | 1699632 | 1699788 |

|               |                      |                                                                                          |       |         |         |
|---------------|----------------------|------------------------------------------------------------------------------------------|-------|---------|---------|
| Spy_1550/1551 | <i>uvrA/corA</i>     | excinuclease ABC subunit A/magnesium and cobalt transporter                              | 3.07  | 1136156 | 1136308 |
| Spy_1557      | <i>mutY</i>          | A/G-specific adenine glycosylase                                                         | 2.22  | 1223795 | 1224008 |
| Spy_1571/1572 | -/-                  | c3-degrading proteinase/hypothetical protein                                             | 2.42  | 619074  | 619164  |
| Spy_1578/1579 | -/-                  | Cro/Ci family transcription regulator/transcription regulator                            | 2.17  | 1404035 | 1404276 |
| Spy_1587/1589 | <i>udp/crgR</i>      | uridine phosphorylase/GntR family transcription regulator                                | 2.23  | 1035022 | 1035171 |
| Spy_1596      | <i>glnA</i>          | glutamine synthetase                                                                     | 5.66  | 215048  | 215279  |
| Spy_1599      | <i>pgk</i>           | phosphoglycerate kinase                                                                  | 2.93  | 1472290 | 1472422 |
| Spy_1638/1639 | <i>lacA.2/lacR.2</i> | galactose-6-phosphate isomerase subunit LacA/lactose phosphotransferase system repressor | 5.87  | 436984  | 437147  |
| Spy_1662      | <i>ulaA</i>          | PTS system ascorbate-specific transporter subunit IIC                                    | 4.68  | 454077  | 454331  |
| Spy_1677      | <i>yajC</i>          | preprotein translocase subunit YajC                                                      | 3.96  | 566490  | 566708  |
| Spy_1684      | <i>ska</i>           | streptokinase                                                                            | 8.41  | 1002968 | 1003109 |
| Spy_1686      | <i>relA</i>          | GTP pyrophosphokinase                                                                    | 2.26  | 1265964 | 1266088 |
| Spy_1704      | <i>dppA</i>          | dipeptide-binding protein                                                                | 15.68 | 1826850 | 1826969 |
| Spy_1708      | <i>dppE</i>          | dipeptide transport ATP-binding protein                                                  | 2.92  | 90525   | 90699   |
| Spy_1718      | <i>sic1.01</i>       | inhibitor of complement protein                                                          | 5.23  | 1700979 | 1701145 |
| Spy_1720      | <i>mga</i>           | trans-acting positive regulator                                                          | 5.18  | 727744  | 727901  |
| Spy_1735      | <i>speB</i>          | cysteine protease SpeB                                                                   | 4.58  | 1493793 | 1493904 |
| Spy_1737      | <i>rgg</i>           | transcription regulator                                                                  | 2.75  | 1755059 | 1755240 |
| Spy_1738      | <i>spd</i>           | phage-associated deoxyribonuclease                                                       | 2.45  | 1532865 | 1533008 |
| Spy_1750      | -                    | hypothetical protein                                                                     | 2.11  | 73561   | 73696   |
| Spy_1757/1758 | -/-                  | hypothetical protein/dipeptidase B                                                       | 3.82  | 1815244 | 1815407 |
| Spy_1768      | <i>ahpC</i>          | peroxiredoxin reductase (NAD(P)H)                                                        | 21.03 | 213966  | 214090  |
| Spy_1784/1785 | -/-                  | PTS system, trehalose-specific IIBC component/trehalose operon transcription repressor   | 3.65  | 11372   | 11491   |
| Spy_1785      | -                    | trehalose operon transcription repressor                                                 | 2.42  | 1188949 | 1189072 |

|                                                                                                                                                                                |                  |                                                                    |      |         |         |
|--------------------------------------------------------------------------------------------------------------------------------------------------------------------------------|------------------|--------------------------------------------------------------------|------|---------|---------|
| Spy_1793                                                                                                                                                                       | <i>nrdD</i>      | anaerobic ribonucleoside triphosphate reductase                    | 9.14 | 1408326 | 1408421 |
| Spy_1794                                                                                                                                                                       | -                | hypothetical protein                                               | 4.5  | 1800671 | 1800884 |
| Spy_1798                                                                                                                                                                       | <i>spxA</i>      | Spx family transcription regulator                                 | 4.22 | 1647749 | 1647895 |
| Spy_1833                                                                                                                                                                       | -                | transposase                                                        | 3.67 | 1547644 | 1547795 |
| Spy_1834                                                                                                                                                                       | -                | hypothetical protein                                               | 2.27 | 1516157 | 1516311 |
| Spy_1840/1841                                                                                                                                                                  | <i>mnmA/sdhB</i> | tRNA-specific 2-thiouridylase<br>MnmA/L-serine dehydratase         | 3.04 | 1328521 | 1328665 |
| Spy_1841                                                                                                                                                                       | <i>sdhB</i>      | L-serine dehydratase                                               | 2.79 | 609     | 769     |
| Spy_1843                                                                                                                                                                       | -                | transglycosylase                                                   | 5.77 | 1837186 | 1837408 |
| Spy_1847                                                                                                                                                                       | -                | CDP-diacylglycerol--glycerol-3-phosphate 3-phosphatidyltransferase | 2.36 | 1540231 | 1540365 |
| Spy_1849                                                                                                                                                                       | -                | zinc protease                                                      | 6.55 | 57917   | 58101   |
| Spy_1851                                                                                                                                                                       | <i>hasA</i>      | hyaluronan synthase                                                | 3.77 | 292742  | 292942  |
| Spy_1856                                                                                                                                                                       | -                | glucose uptake protein                                             | 3.37 | 1711190 | 1711395 |
| Spy_1857                                                                                                                                                                       | <i>guaB</i>      | inosine 5'-monophosphate dehydrogenase                             | 6.82 | 828775  | 828903  |
| Spy_1857                                                                                                                                                                       | <i>guaB</i>      | inosine 5'-monophosphate dehydrogenase                             | 2.57 | 1451492 | 1451574 |
| Spy_1865                                                                                                                                                                       | <i>htrA</i>      | protease Do                                                        | 2.2  | 279840  | 279919  |
| Enrichment is determined with respect to the mock control. Greater than 2-fold enrichment is considered significant.                                                           |                  |                                                                    |      |         |         |
| Genes are considered to be associated with a ChIP-seq peak if the translation start site is within 100 bp upstream to 500 bp downstream of the position of maximal enrichment. |                  |                                                                    |      |         |         |
| Genes are listed multiple times if more than one ChIP-Seq peak was present within 100 bp upstream to 500 bp downstream of the transcription start site.                        |                  |                                                                    |      |         |         |
| Multiple genes are listed for a single peak if that peak is within 100 bp upstream to 500 bp downstream of more than one gene.                                                 |                  |                                                                    |      |         |         |
| *Gene locus numbers refer to MGAS5005 genome.                                                                                                                                  |                  |                                                                    |      |         |         |
