# Supplementary material for: Identification of Group A Streptococcus Genes Directly Regulated by CsrRS and Novel Intermediate Regulators
Source: PubMed Central journal article supplement (PMC8406183; doi:10.1128/mbio.01642-21), 2021-07-13
Supplement: mbio.01642-21-st007.pdf [file mbio.01642-21-st007.pdf]

**Table S7. Genes indirectly regulated by CsrR that are regulated by novel transcription regulators**

| Gene Locus* | Gene Name     | Gene Product                                                         | NanoString Log2-fold change |              | RNAseq Log2-fold change |
|-------------|---------------|----------------------------------------------------------------------|-----------------------------|--------------|-------------------------|
|             |               |                                                                      | 0195Ω vs. WT                | Δ0186 vs. WT | Δ <i>csrR</i> vs. WT    |
| Spy_0029    | <i>purD</i>   | phosphoribosylamine-glycine ligase                                   | 1.04                        | 0.87         | -1.25                   |
| Spy_0034    | -             | transcription regulator                                              | 0.49                        | 1.09         | 1.37                    |
| Spy_0113    | -             | transposase                                                          | 2.54                        | 0.84         | 7.17                    |
| Spy_0158    | <i>opuABC</i> | glycine betaine-binding protein/glycine betaine transporter permease | 1.24                        | 0.47         | -1.53                   |
| Spy_0352    | -             | hypothetical protein                                                 | 2.97                        | 2.83         | 6.33                    |
| Spy_0356    | <i>speJ</i>   | exotoxin type J                                                      | 0.23                        | 1.43         | 1.84                    |
| Spy_0551    | <i>rplS</i>   | 50S ribosomal protein L19                                            | 0.14                        | -1.29        | -1.77                   |
| Spy_0652    | -             | hypothetical protein                                                 | 0.63                        | 1.38         | -1.53                   |
| Spy_0858    | <i>xpt</i>    | xanthine phosphoribosyltransferase                                   | 0.95                        | 1.51         | -1.59                   |
| Spy_0978    | -             | Na(+)-linked D-alanine glycine permease                              | 1.75                        | 1.14         | -1.06                   |
| Spy_1079    | -             | PTS system cellobiose-specific transporter subunit IIC               | 3.15                        | 1.01         | 1.47                    |
| Spy_1170    | -             | hypothetical protein                                                 | -0.06                       | 2.15         | 1.15                    |
| Spy_1238    | <i>artQ</i>   | arginine transporter permease                                        | 1.65                        | 1.02         | -1.16                   |
| Spy_1274    | -             | acetyltransferase                                                    | 1.81                        | 0.98         | 1.28                    |
| Spy_1401    | -             | putative PTS system, enzyme IIA component                            | 4.09                        | 0.93         | 1.11                    |
| Spy_1472    | <i>hit</i>    | bis(5'-nucleosyl)-tetraphosphatase (asymmetrical)                    | 0.18                        | 1.74         | 1.52                    |
| Spy_1528    | -             | ferrichrome-binding protein                                          | 1.13                        | 1.3          | -1.83                   |
| Spy_1540    | <i>endoS</i>  | endo-beta-N-acetylglucosaminidase F2                                 | 2.96                        | -0.33        | -1.29                   |
| Spy_1573    | <i>glpF.2</i> | glycerol uptake facilitator protein                                  | 0.09                        | 1.14         | -1.06                   |
| Spy_1687    | <i>sclA</i>   | hypothetical protein                                                 | 3.32                        | 0.35         | 7.75                    |
| Spy_1733    | -             | hypothetical protein                                                 | 4.12                        | 1.19         | 3.69                    |
| Spy_1839    | -             | MutT/nudix family protein                                            | 1.07                        | -0.06        | -1.15                   |

\*Gene locus numbers refer to MGAS5005 genome.
