# Supplementary material for: Identification of Group A Streptococcus Genes Directly Regulated by CsrRS and Novel Intermediate Regulators
Source: PubMed Central journal article supplement (PMC8406183; doi:10.1128/mbio.01642-21), 2021-07-13
Supplement: mbio.01642-21-st008.pdf [file mbio.01642-21-st008.pdf]

**Table S8. NanoString analysis of CsrR-regulated genes at mid-exponential phase and the contribution of RopB to regulation**

| Gene Locus* | Gene Name        | Gene Product                                                         | Log2-fold change $\Delta csrR$ vs. WT | Log2-fold change $\Delta ropB$ vs. WT |
|-------------|------------------|----------------------------------------------------------------------|---------------------------------------|---------------------------------------|
| Spy_0034    | -                | transcription regulator                                              | 1.11                                  | 1.77                                  |
| Spy_0113    | -                | transposase                                                          | 7.63                                  | 0.14                                  |
| Spy_0115    | -                | hypothetical protein                                                 | 10.21                                 | 1.32                                  |
| Spy_0139    | <i>nga</i>       | NAD glycohydrolase                                                   | 3.06                                  | 1.43                                  |
| Spy_0140    | <i>ifs</i>       | NADase inhibitor                                                     | 2.81                                  | 1.41                                  |
| Spy_0141    | <i>slo</i>       | streptolysin O                                                       | 2.87                                  | 1.8                                   |
| Spy_0142    | -                | hypothetical protein                                                 | 2.22                                  | 2                                     |
| Spy_0143    | -                | hypothetical protein                                                 | 11.49                                 | -0.22                                 |
| Spy_0144    | -                | hypothetical protein                                                 | 10.52                                 | 1.36                                  |
| Spy_0157    | <i>opuAA</i>     | glycine betaine transport ATP-binding protein                        | -2.74                                 | 1.96                                  |
| Spy_0158    | <i>opuABC</i>    | glycine betaine-binding protein/glycine betaine transporter permease | -2.12                                 | 1.4                                   |
| Spy_0180    | -                | murein endopeptidase                                                 | 1.56                                  | 0.67                                  |
| Spy_0186    | -                | transcription regulator                                              | 2.66                                  | 2.09                                  |
| Spy_0195    | -                | MarR family transcription regulator                                  | -1.71                                 | 1.71                                  |
| Spy_0275    | -                | serine/threonine transporter SstT                                    | -1.67                                 | 0.88                                  |
| Spy_0281    | -                | hypothetical protein                                                 | 1.02                                  | 1.08                                  |
| Spy_0282    | <i>csrR</i>      | response regulator                                                   | -8.69                                 | 0.26                                  |
| Spy_0341    | <i>scpC/prtS</i> | IL-8 protease                                                        | 4.58                                  | 0.18                                  |
| Spy_0351    | <i>spyA</i>      | C3 family ADP-ribosyltransferase                                     | 3.27                                  | 1.33                                  |
| Spy_0352    | -                | hypothetical protein                                                 | 7.29                                  | 2.12                                  |
| Spy_0354    | -                | hypothetical protein                                                 | 3.51                                  | 0.61                                  |
| Spy_0355    | -                | hypothetical protein                                                 | 6.6                                   | 2.13                                  |
| Spy_0356    | <i>speJ</i>      | exotoxin type J                                                      | 2.16                                  | 0.77                                  |
| Spy_0357    | -                | hypothetical protein                                                 | 2.35                                  | 0.8                                   |
| Spy_0500    | -                | N-acetylmuramoyl-L-alanine amidase                                   | 1.07                                  | 1.13                                  |
| Spy_0551    | <i>rplS</i>      | 50S ribosomal protein L19                                            | -1.38                                 | -1.87                                 |
| Spy_0561    | <i>epf</i>       | extracellular matrix binding protein                                 | 3.38                                  | -1.26                                 |
| Spy_0563    | <i>sagB</i>      | Streptolysin S synthesis protein                                     | 0.99                                  | -3.16                                 |
| Spy_0598    | <i>mscL</i>      | large-conductance mechanosensitive channel                           | -0.96                                 | -2.49                                 |
| Spy_0635    | <i>rpmA</i>      | 50S ribosomal protein L27                                            | -1.19                                 | -1.95                                 |
| Spy_0639    | <i>pyrR</i>      | putative pyrimidine regulatory protein                               | -1.79                                 | -1.32                                 |
| Spy_0640    | <i>pyrP</i>      | putative uracil permease                                             | -1.56                                 | -0.45                                 |
| Spy_0651    | <i>bspA</i>      | cell surface protein                                                 | -1.01                                 | 0.68                                  |
| Spy_0652    | -                | hypothetical protein                                                 | -1.19                                 | 0.5                                   |
| Spy_0668    | <i>mac</i>       | IgG-degrading protease                                               | 7.42                                  | -0.12                                 |

|                                               |                  |                                                   |       |       |
|-----------------------------------------------|------------------|---------------------------------------------------|-------|-------|
| Spy_0777                                      | -                | hypothetical protein                              | 3.34  | 0.39  |
| Spy_0858                                      | <i>xpt</i>       | xanthine phosphoribosyltransferase                | -0.98 | 1.27  |
| Spy_0859                                      | -                | xanthine permease                                 | -0.98 | 1.36  |
| Spy_0996                                      | <i>speA2</i>     | enterotoxin                                       | 2.35  | 2.52  |
| Spy_1106                                      | <i>grab</i>      | protein G-related alpha 2M-binding protein        | 2.79  | -0.32 |
| Spy_1114                                      | -                | hypothetical protein                              | 1.75  | 0.21  |
| Spy_1169                                      | <i>spd3</i>      | DNase                                             | 1.07  | 0.83  |
| Spy_1170                                      | -                | hypothetical protein                              | 1.03  | 0.45  |
| Spy_1237                                      | <i>artP</i>      | arginine transport ATP-binding protein            | -1.16 | 0.47  |
| Spy_1238                                      | <i>artQ</i>      | arginine transporter permease                     | -1.35 | 0.58  |
| Spy_1274                                      | -                | acetyltransferase                                 | 1.74  | -1.36 |
| Spy_1290                                      | -                | hypothetical protein                              | 1.44  | -0.44 |
| Spy_1291                                      | -                | ATP-dependent RNA helicase                        | 2.61  | 0.79  |
| Spy_1329                                      | <i>cysM</i>      | putative O-acetylserine lyase                     | -1.13 | 0.72  |
| Spy_1386                                      | -                | hypothetical protein                              | -1.36 | -1.41 |
| Spy_1401                                      | -                | putative PTS system, enzyme IIA component         | 2.26  | -0.11 |
| Spy_1407                                      | -                | esterase                                          | 2.64  | 2.25  |
| Spy_1415                                      | <i>sdaD2</i>     | phage-encoded DNase                               | 3.54  | 1.8   |
| Spy_1472                                      | <i>hit</i>       | bis(5'-nucleosyl)-tetraphosphatase (asymmetrical) | 1     | 0.11  |
| Spy_1473                                      | -                | hypothetical protein                              | 1.14  | 0.2   |
| Spy_1477                                      | -                | guanine-hypoxanthine permease                     | -1.99 | 0.18  |
| Spy_1531                                      | <i>isp2</i>      | hypothetical protein                              | 2.12  | 0.15  |
| Spy_1556                                      | -                | hypothetical protein                              | 3.84  | 0.35  |
| Spy_1557                                      | <i>mutY</i>      | A/G-specific adenine glycosylase                  | 1.65  | 0.37  |
| Spy_1680                                      | <i>pulA</i>      | Pullulanase                                       | 0.98  | 0.09  |
| Spy_1684                                      | <i>ska</i>       | streptokinase                                     | 4.29  | 1.39  |
| Spy_1704                                      | <i>dppA</i>      | dipeptide-binding protein                         | -2.52 | 0     |
| Spy_1714                                      | -                | cell surface protein                              | 1.73  | 1.32  |
| Spy_1715                                      | <i>scpA</i>      | C5A peptidase                                     | 1.92  | 1.51  |
| Spy_1718                                      | <i>sic1.01</i>   | inhibitor of complement protein                   | 3.79  | 1.88  |
| Spy_1731                                      | -                | hypothetical protein                              | 2.45  | 1.04  |
| Spy_1733                                      | -                | hypothetical protein                              | 1.05  | -0.84 |
| Spy_1735                                      | <i>speB</i>      | cysteine protease SpeB                            | 1.18  | -2.01 |
| Spy_1738                                      | <i>spd/speMF</i> | phage-associated deoxyribonuclease                | 2.25  | -0.34 |
| Spy_1758                                      | -                | dipeptidase B                                     | 1.81  | 0.18  |
| Spy_1782                                      | <i>pepO</i>      | neutral endopeptidase                             | 1.52  | 0.06  |
| Spy_1851                                      | <i>hasA</i>      | hyaluronan synthase                               | 7.18  | 1.41  |
| *Gene locus numbers refer to MGAS5005 genome. |                  |                                                   |       |       |
