# Supplementary material for: Identification of Group A Streptococcus Genes Directly Regulated by CsrRS and Novel Intermediate Regulators
Source: PubMed Central journal article supplement (PMC8406183; doi:10.1128/mbio.01642-21), 2021-07-13
Supplement: mbio.01642-21-st009.pdf [file mbio.01642-21-st009.pdf]

**Table S9. NanoString analysis of CsrR-regulated genes at stationary phase and the contribution of RopB to regulation**

| Gene Locus* | Gene Name     | Gene Product                                                         | Log2-fold change $\Delta csrR$ vs. WT | Log2-fold change $\Delta ropB$ vs. WT |
|-------------|---------------|----------------------------------------------------------------------|---------------------------------------|---------------------------------------|
| Spy_0017    | -             | putative secreted protein                                            | -1.6                                  | 1.04                                  |
| Spy_0034    | -             | transcription regulator                                              | 2.45                                  | -0.08                                 |
| Spy_0113    | -             | transposase                                                          | 3.75                                  | -1.1                                  |
| Spy_0115    | -             | hypothetical protein                                                 | 7.2                                   | -0.88                                 |
| Spy_0139    | <i>nga</i>    | NAD glycohydrolase                                                   | 5.03                                  | -0.67                                 |
| Spy_0140    | <i>ifs</i>    | NADase inhibitor                                                     | 4.64                                  | -0.58                                 |
| Spy_0141    | <i>slo</i>    | streptolysin O                                                       | 4.8                                   | -0.46                                 |
| Spy_0142    | -             | hypothetical protein                                                 | 2.22                                  | -1.56                                 |
| Spy_0143    | -             | hypothetical protein                                                 | 9.19                                  | -1.37                                 |
| Spy_0144    | -             | hypothetical protein                                                 | 8.87                                  | -1.38                                 |
| Spy_0157    | <i>opuAA</i>  | glycine betaine transport ATP-binding protein                        | -2.27                                 | -0.04                                 |
| Spy_0158    | <i>opuABC</i> | glycine betaine-binding protein/glycine betaine transporter permease | -2.84                                 | -0.49                                 |
| Spy_0186    | -             | transcription regulator                                              | 2.5                                   | -0.05                                 |
| Spy_0275    | -             | serine/threonine transporter SstT                                    | -1.06                                 | 0.06                                  |
| Spy_0281    | -             | hypothetical protein                                                 | 2.81                                  | 0.81                                  |
| Spy_0282    | <i>csrR</i>   | response regulator                                                   | -7.21                                 | 0.81                                  |
| Spy_0351    | <i>spyA</i>   | C3 family ADP-ribosyltransferase                                     | 4.73                                  | -0.03                                 |
| Spy_0352    | -             | hypothetical protein                                                 | 6.11                                  | -0.42                                 |
| Spy_0355    | -             | hypothetical protein                                                 | 1.54                                  | -2.12                                 |
| Spy_0356    | <i>speJ</i>   | exotoxin type J                                                      | 1.22                                  | -0.14                                 |
| Spy_0402    | -             | hypothetical protein                                                 | 1.29                                  | -0.43                                 |
| Spy_0500    | -             | N-acetylmuramoyl-L-alanine amidase                                   | 1.62                                  | 0.21                                  |
| Spy_0501    | -             | hypothetical protein                                                 | 1.14                                  | -0.16                                 |
| Spy_0561    | <i>epf</i>    | extracellular matrix binding protein                                 | 3.47                                  | -1.12                                 |
| Spy_0562    | <i>sagA</i>   | streptolysin S                                                       | 2.64                                  | -1.06                                 |
| Spy_0563    | <i>sagB</i>   | Streptolysin S synthesis protein                                     | 2.93                                  | -0.55                                 |
| Spy_0571    | -             | hypothetical protein                                                 | 1.93                                  | 0.05                                  |
| Spy_0598    | <i>mscL</i>   | large-conductance mechanosensitive channel                           | -1.77                                 | -0.64                                 |
| Spy_0639    | <i>pyrR</i>   | putative pyrimidine regulatory protein                               | -1.35                                 | 0.87                                  |
| Spy_0640    | <i>pyrP</i>   | putative uracil permease                                             | -1.46                                 | 2.07                                  |
| Spy_0652    | -             | hypothetical protein                                                 | -1.19                                 | -0.12                                 |
| Spy_0668    | <i>mac</i>    | IgG-degrading protease                                               | 3.83                                  | -1.95                                 |
| Spy_0673    | <i>papS</i>   | tRNA CCA-pyrophosphorylase                                           | 1.29                                  | -0.03                                 |
| Spy_0713    | <i>bcaT</i>   | branched-chain amino acid aminotransferase                           | -1.14                                 | -0.54                                 |
| Spy_0777    | -             | hypothetical protein                                                 | 2.68                                  | 0.21                                  |

|          |               |                                                      |       |       |
|----------|---------------|------------------------------------------------------|-------|-------|
| Spy_0784 | <i>yesN</i>   | putative two-component sensor histidine kinase       | 1.02  | 0.12  |
| Spy_0809 | <i>srtE</i>   | conserved hypothetical protein - lantibiotic         | 1.1   | -0.5  |
| Spy_0913 | -             | putative integrase/recombinase                       | -1.03 | 0.4   |
| Spy_0947 | <i>ciaH</i>   | sensor protein                                       | 1.25  | -0.69 |
| Spy_0996 | <i>speA2</i>  | enterotoxin                                          | 3.95  | -0.08 |
| Spy_1139 | <i>nagB</i>   | glucosamine-6-phosphate isomerase                    | -1.31 | -0.93 |
| Spy_1169 | <i>spd3</i>   | DNase                                                | 2.5   | -0.92 |
| Spy_1170 | -             | hypothetical protein                                 | 2.37  | -0.87 |
| Spy_1171 | -             | conserved hypothetical protein, phage associated     | 1.11  | -1.18 |
| Spy_1284 | <i>ccdA</i>   | putative cytochrome C-type biogenesis protein        | 1.08  | -1.26 |
| Spy_1290 | -             | hypothetical protein                                 | 3.41  | -0.81 |
| Spy_1291 | -             | ATP-dependent RNA helicase                           | 3.57  | -0.59 |
| Spy_1329 | <i>cysM</i>   | putative O-acetylserine lyase                        | -1.17 | -0.32 |
| Spy_1407 | -             | esterase                                             | 2.16  | 0.61  |
| Spy_1415 | <i>sdaD2</i>  | phage-encoded DNase                                  | 1.49  | -0.84 |
| Spy_1472 | <i>hit</i>    | bis(5'-nucleosyl)-tetrphosphatase (asymmetrical)     | 0.98  | -0.05 |
| Spy_1477 | -             | guanine-hypoxanthine permease                        | -1    | -0.05 |
| Spy_1479 | <i>manL</i>   | PTS system mannose-specific transporter subunit IIAB | -2.13 | -0.35 |
| Spy_1499 | <i>grpE</i>   | putative Hsp-70 cofactor                             | -2.13 | -0.02 |
| Spy_1504 | -             | hypothetical protein                                 | -1.36 | -0.71 |
| Spy_1531 | <i>isp2</i>   | hypothetical protein                                 | 1.91  | 0.29  |
| Spy_1540 | <i>endoS</i>  | endo-beta-N-acetylglucosaminidase F2                 | 1.09  | 0.75  |
| Spy_1556 | -             | hypothetical protein                                 | 3.75  | 0.54  |
| Spy_1557 | <i>mutY</i>   | A/G-specific adenine glycosylase                     | 1.28  | 0.05  |
| Spy_1601 | -             | membrane protease                                    | 1.92  | 0.59  |
| Spy_1635 | <i>lacD.2</i> | putative tagatose 1,6-diphosphate aldolase           | -2.11 | 0.07  |
| Spy_1636 | <i>lacC.2</i> | putative galactose-6-phosphate isomerase (C subunit) | -1.77 | 0.17  |
| Spy_1637 | <i>lacB.2</i> | putative galactose-6-phosphate isomerase (B subunit) | -1.38 | 0.42  |
| Spy_1638 | <i>lacA</i>   | galactose-6-phosphate isomerase subunit LacA         | -1.92 | 0.4   |
| Spy_1684 | <i>ska</i>    | streptokinase                                        | 4.65  | -0.32 |
| Spy_1687 | <i>sclA</i>   | hypothetical protein                                 | 1.27  | -2.39 |
| Spy_1702 | <i>smeZ</i>   | mitogenic exotoxin Z                                 | 1.26  | -0.39 |
| Spy_1704 | <i>dppA</i>   | dipeptide-binding protein                            | -1.21 | -0.1  |
| Spy_1714 | -             | cell surface protein                                 | 2.98  | -0.03 |

|                                               |                  |                                     |       |       |
|-----------------------------------------------|------------------|-------------------------------------|-------|-------|
| Spy_1715                                      | <i>scpA</i>      | C5A peptidase                       | 3.84  | -0.18 |
| Spy_1718                                      | <i>sic1.01</i>   | inhibitor of complement protein     | 6.14  | -0.04 |
| Spy_1719                                      | <i>emm1.0</i>    | M protein                           | 1.94  | 0.63  |
| Spy_1731                                      | -                | hypothetical protein                | 1.6   | 0.96  |
| Spy_1737                                      | <i>ropB</i>      | transcription regulator             | -1.49 | -7.46 |
| Spy_1738                                      | <i>spd/speMF</i> | phage-associated deoxyribonuclease  | 1.7   | -0.95 |
| Spy_1825                                      | -                | PadR family transcription regulator | -2.75 | -0.88 |
| Spy_1851                                      | <i>hasA</i>      | hyaluronan synthase                 | 3.13  | -2.06 |
| Spy_1857                                      | <i>guaB</i>      | inosine monophosphate dehydrogenase | -1.76 | -0.51 |
| *Gene locus numbers refer to MGAS5005 genome. |                  |                                     |       |       |
